# Supplementary material for: In-Silico Analysis of Binding Site Features and Substrate Selectivity in Plant Flavonoid-3-O Glycosyltransferases (F3GT) through Molecular Modeling, Docking and Dynamics Simulation Studies
Source: PubMed Central journal article supplement (PMC3965439; doi:10.1371/journal.pone.0092636), 2014-03-25

Figure S1 Multiple sequence alignment of 30 F3GT protein sequences. The regions involved in acceptor binding are enclosed in rectangular boxes

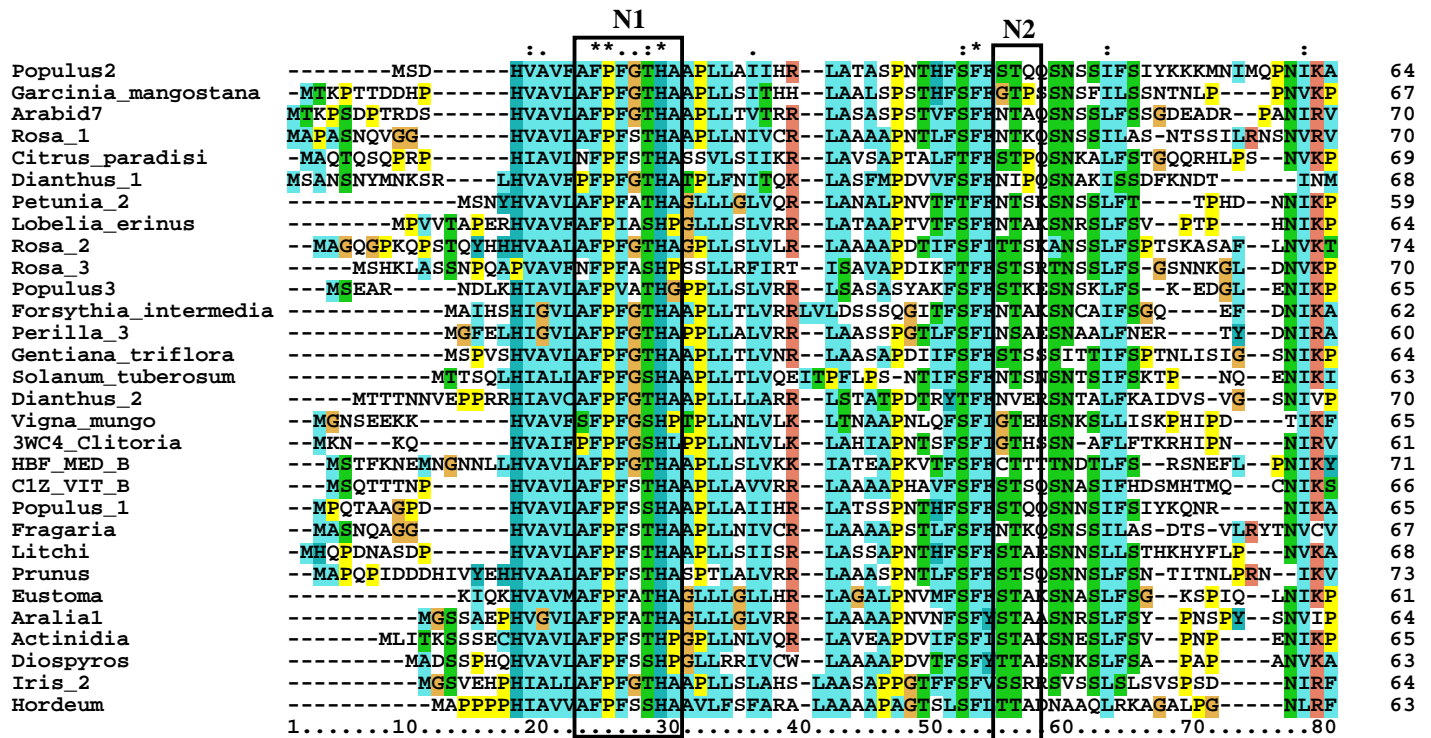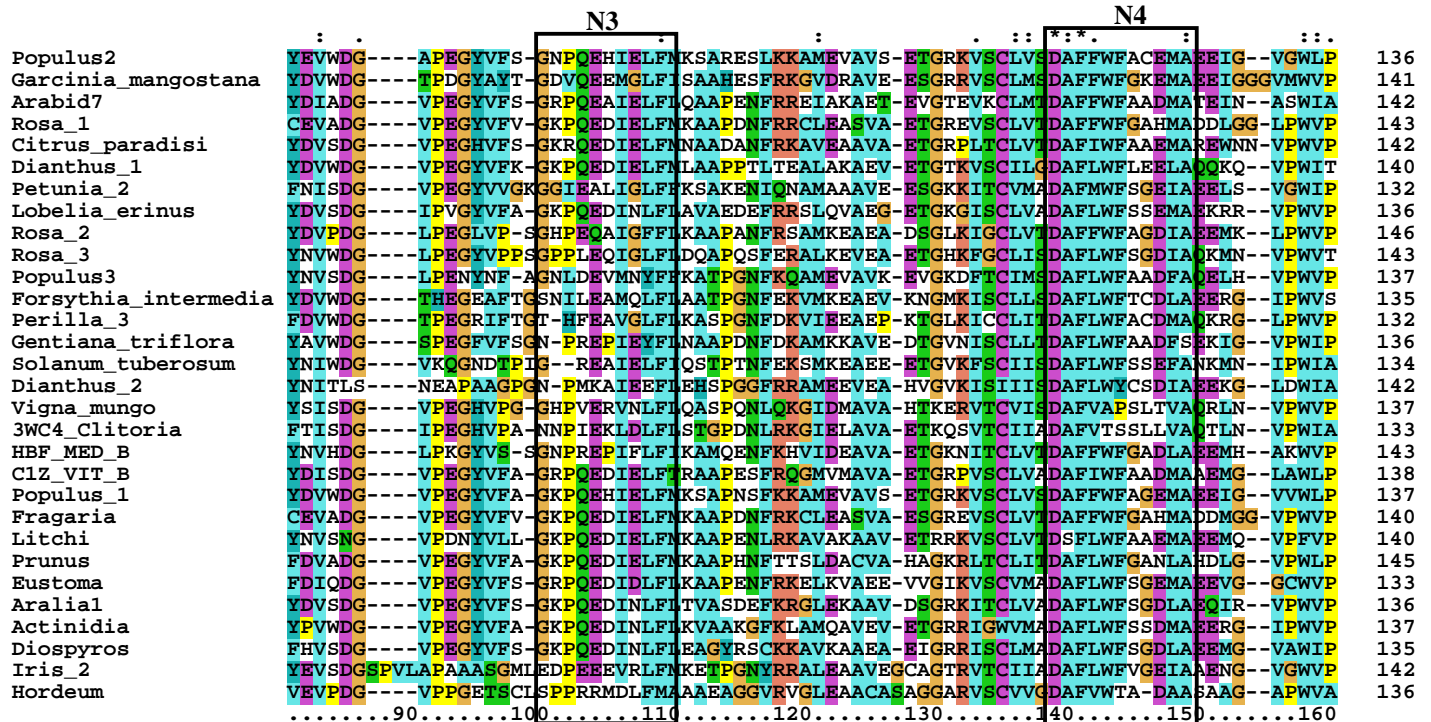

|                      | N5                                | N6                              |                             |
|----------------------|-----------------------------------|---------------------------------|-----------------------------|
| Populus2             | HWTAGPNSLSAHVYTDLIRETFDGGMVGRE    | ---KTIISLIQGMSS-KIRICDLPKGVLF   | --GNTESFFNMLHKMGKALP 210    |
| Garcinia_mangostana  | HWTAGPHALSSSLHYTDFIRESFA-GDVTQRED | ---ELLSSIPGMS-RVRVCDLPKGVVF     | --GRLDSLFQMLHKMGKQALP 214   |
| Arabid7              | HWTAGANLSLAHLYTDLIRETIGVKEVGERME  | ---ETIGVISGME-KIRVKDTPKGVVF     | --GNLDSVFKMLHQMGLALP 216    |
| Rosa_1               | HWTAGPASLSAHVHTDLIRNTTSMGGHDGKE   | ---TITAVTAGMS-KVRPQDLPKGIIF     | --GKLDLSFRMLHQMGLMLP 216    |
| Citrus_paradisi      | QWPAGPNSLSAHLYTDIIRDKIGTQ-SQNQDQ  | ---QLIHFIIPGMN-KIRVADLPKGVVS    | --GDLDLSFVMLHQMGRQLP 215    |
| Dianthus_1           | YVMSEHSLLAHICTDLIRQTIIGIHEKAERKD  | ---EELDFIPGLES-KIRVQDLPKGVIM    | --GNLDSYFARMLHQMGRALP 215   |
| Petunia_2            | IWTSAGSLSVHYTDLIRENVEAQGIAGRED    | ---EILTFIPGFA-ELRLGSLPSGVVS     | --GDLESPPFVMLHKMGKTIG 206   |
| Lobelia_erinus       | IWTSAGSLSIHFYTDLIRQTVGLNGIEGRKD   | ---EMLDFIPGFS-AVRLGDLPGGVLS     | --GNLESPPFIMLYKMGQCLT 210   |
| Rosa_2               | IWTAGPRSLLVHAATDLIRQV--LG---TDE   | ---KTLEFLPGFS-KLEVADLPKGVVS     | --GNLESPISELLHKMGQQLP 215   |
| Rosa_3               | IWS-GPRPLLVLHLETDMIREKVGAPG--QED  | ---KTLDFLPGFS-NEFLASDLPKGVVF    | --GNIESPLANMLYKMGQKLP 214   |
| Populus3             | IWTSSSRSLLLVLETDLVHKMRSIIN-EPED   | ---RTIDILPGFS-ELRGS DIPKELFH    | --DVKESQFAAMLCKIGLALP 210   |
| Forsythia_intermedia | HWTAAASCSLSAHMYTDQIWSLMRSTGTAKTEE | ---KTLFSVPGMT-SVRFS DLPREILS    | --DNLESPLIMLYKMQVQKLS 209   |
| Perilla_3            | HWTAAASCSLSHLYTDQIV---KAGTAN-QE   | ---QNLFSFIPGLE-MATLTDLPKGVVF    | --DNLSPFLAINKMVKELP 201     |
| Gentiana_triflora    | VWTAASCSLCLHYTDEIRSRFAEFDIAEKAE   | ---KTIDFIPGLES-AISFSDLPBELIM    | --EDSOSIFALMLHNMGLKLIH 210  |
| Solanum_tuberosum    | HWTAGCSLSIHLHYTDLIRN-----ND       | ---ETLLKIPGFS-STLKMSDMPREIVA    | --ESLNGPMSMLYNMALNLH 199    |
| Dianthus_2           | IWTAGPNSLSAHLYTDLIREKTGSKG--VHDV  | ---DVLVSPGLS-NVRISDLEPGLVS      | --GILDAPFQMLHKMGLELPL 216   |
| Vigna_mungo          | VWPPLSCSLSAHFYTELIRQTCNSAAGDTPLD  | -----FVPGLES-KMRVEDLPKDVIOGAGEE | TLFRTLASLGSVLP 209          |
| 3WC4_Clitorea        | HWPNVSCSLSLYFNIDLRDKCKDAKNATLD    | -----FLPGLS-KLRVEDVPQDMLD       | -VGEKETLFRMLNSLGVVLP 204    |
| HBF_MED_B            | IWTAGPHSLTHVYTDLIREKTGSKG--VHDV   | ---KSIDVLPGFP-ELKASDLPKGVIK     | --DIDVFATMLHKMGLELPL 214    |
| C1Z_VIT_B            | HWTAGPNSLSHVVYIDEIREKIGVSGIQGRE   | ---ELLNFIIPGMS-KVRFRDLQKGVIF    | --GNLNSLFRMLHRMGQVLP 212    |
| Populus_1            | HWTAGPNSLSAHVYTDLIRDTFVGGVAGHED   | ---ELLSLIPGMS-KIRIRDLKPVGLF     | --GNLEAVFNMLHKMGKRALP 211   |
| Fragaria             | IWTAGPASLSAHVHTDLIRNTTSGDCHDEKE   | ---TIT-VIAGMS-KVRPQDLPKGIIF     | --GNLESFVFRMLHQMGLMLP 212   |
| Litchi               | QWLSGSSSLSTHFYTDVIREKMGLEGIEGRE   | ---EQLKFIQGMSS-KVCIRDLPKGVLF    | --GNLOSIFDMLHRMGQLPL 214    |
| Prunus               | IWLSGLNLSLHYTDLIRHTIGTQSIAGRENELI | TKNVNIPGMS-KVRIKDLKPVGVIF       | --GNLDSVFRMLHQMGLQLP 222    |
| Eustoma              | VWTSAGSLSVHYTELIRETIGLVAGRED      | ---EILKFIIPGFS-ELRLGDLPSGVVF    | --GNLESPPFVMLHKMGQTLS 207   |
| Aralial              | IWTSAGSLSIHFYTDLIRQTVGLGGIEGRMD   | ---EILTFIPGFS-ELRLGDLPGGVLF     | --GNLESPPFIMLYKMGKQTLPL 210 |
| Actinidia            | IWMSGASLSHLYTDLIRETVGFSGISGRON    | ---ELLKFIIPGFS-ELRLGDLPSGVLF    | --GNLKSPPFIMLYKMGKQALP 211  |
| Diospyros            | VWTSGVCFSVHYTDLIRDTVGINALAGRED    | ---EIVKFIIPGFSGGVRLGDLPSGVLF    | --GNLDSYFVMLHKMGKVLQ 210    |
| Iris_2               | IWTGGPCSFQAHLYTDLIRDRIGVGEKADLDA  | ---DLQFIPGLA-SLRVRDLPKGVVF      | --GHLDGAFATMLYRMATELPL 215  |
| Hordeum              | VWTAASCALLAHRTDALRRDVGQAASRADE    | ---LLVAHAGLG-GYRVRDLPKGVVS      | --GDFNYVILLVHRQARQLP 209    |

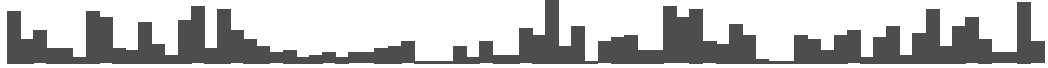

| Populus2             | QAA-AVFINSFEELDP-GI IKDLKSRFK-KFLNIGP | SHLILS---PPP                | MEDTY-----GCMTWLDKQ--KL-AS-VAY 273 |
|----------------------|---------------------------------------|-----------------------------|------------------------------------|
| Garcinia_mangostana  | KAD-AVFINSFEELDP-TFTNDLKSCLK-CCLNIGP  | FNLISSP--PAQV               | PDY-----GCIPWLDKQ--QL-AS-VAY 277   |
| Arabid7              | RAT-AVFINSFEELDP-TLTNNLRSRFRK-RYLNIGP | LGLLSSTLQQLVQDPH            | -----GCLAWMEKR--SS-GS-VAY 281      |
| Rosa_1               | KAT-AVFINSFEELDP-VITNDLKSFK-RYLVNVP   | FDLLESAPAAATTLQNGDVVVVGDGVV | GDGCLSWLDDK--KA-AS-VVY 289         |
| Citrus_paradisi      | KAA-AVFINSFEELDP-ELTNHLKTKFNKFLSV     | GPFKLLLASDQQPSSATDLD        | ---DEYGCLAWLDDKQK--AS-VAY 288      |
| Dianthus_1           | RAS-AVICISSQELDP-VATNELNRLN-KLINVGP   | PLSLIQSNLSFSGTNK            | -----SLGWLDKQ--ES-ENS-VAY 280      |
| Petunia_2            | KAT-ALPVNSFEELDP-PIVEDLKSFK-FNNFLN    | VGPFNLITPPPSANI             | -----TDEYGCIAWLDKQ--PGSVAY 271     |
| Lobelia_erinus       | KAT-AIPINSFQEMDP-EINKDLNKH-FSNFLN     | IGPFNLISPTPLN               | -----TDEFACIPWLDKHL--PQSVAY 274    |
| Rosa_2               | KAA-AVAINSFEELDP-DVVNELKSR-FRKLNV     | GPFNLTSPSPPLKDDSS           | -----GCLWLDKHK--PASVVY 279         |
| Rosa_3               | QAT-AVAVNSFTMDL-KVSEELKRR-LKKLLLV     | GPHLVRVPSAQSDDE             | -----EKKDACPWLDNKH--PASVAY 283     |
| Populus3             | QAA-VVASNSFEELDP-DAVILFKSR-LPKFLN     | IGPFVLTSPDPFMSDPH           | -----GCLWLDKQ--QESVVY 273          |
| Forsythia_intermedia | KST-AIVVNSFEELDP-VITNDLKSFK-FQNFN     | IGPILSPT--LSNGD             | -----SGQECLLWLEKOR--HASVIY 273     |
| Perilla_3            | KST-AVVLNSFEELDP-IITDDLKTK-FKNFLN     | VGPFILASPP--QATPD           | -----DETGCLSWLADT--SPKVVY 266      |
| Gentiana_triflora    | KAT-AVAVNSFEELDP-IITNHLRSTNQLNILN     | IGP--LQNLSSSIPP             | -----EDNECLKWLQTK--ESSVVY 273      |
| Solanum_tuberosum    | KAN-AVVLNSFEELDP-IINKDLKSK-LQVLN      | IGPLVILSNNVFLDANS           | -----DESGCIHWLDNCK--ERSVVY 266     |
| Dianthus_2           | KAK-VVTLNVFQELSP-LVVNDLNSK--LKL       | LCVGPFLCPP--QVYS            | -----DPDNCLDWLDQHG--PKTIAY 278     |
| Vigna_mungo          | QAE-AVVVNFEEELDPPLLVNDMKSFKF-YYLY     | VGFLTSLPLPLPPSDDTET         | -----GCLSWLDDK--KG-GS-VVY 277      |
| 3WC4_Clitorea        | QAK-AVVVNFEEELDPPLFVKYMRSKLQ-SLLYV    | ---VPLPCPQLLPEIDN           | -----GCLSWLDDK--SS-RS-VAY 268      |
| HBF_MED_B            | RAN-AVAINSFATHP-LTENELNSK-FKLLLV      | GPFNLTTPQR-KVSDEH           | -----GCLWLDQHE--NSSVVY 277         |
| C1Z_VIT_B            | KAT-AVFINSFEELDD-SLTNDLKSCLK-TYLN     | IGPFNLITP--PPVVPNTT         | -----GCLQWLKER--KP-TS-VVY 275      |
| Populus_1            | KAA-AVFINSFEELDP-RITRDLKSRFK-EFLN     | IGPFNMISP--APPAADTY         | -----GCITWLDKQ--KL-AS-VAY 274      |
| Fragaria             | LAT-AVFINSFEELDP-VITNDLKSFK-RFLNV     | GPLDLLEPTASAAATTPQIAEAVAGD  | GCLSWLDDK--KA-AS-VVY 285           |
| Litchi               | QGD-AVVNSFEELDP-TINNDLKSFK-QFLNV      | GPFNLTSPPAVP                | -----DTSSCLPWLDRQ--KP-AS-VAY 277   |
| Prunus               | RAN-AVVLNSFEELDI-AVTNDLKSFKFN-KLLN    | VGPFNLAAASPPLEAPTAADDVT     | --GCLSWLDDK--KA-ASSVVY 294         |
| Eustoma              | KAS-ALPVNSFEELDP-PLIQDLKSK-FKNVLN     | VGPFNLTPPPIANT              | -----TDIHGCIWLDKQS--PRSVY 272      |
| Aralial              | RAA-AVPINSFEELDP-DLMKDKSK-FKKILN      | VGPFNLTSPPSSN               | -----SDEHGCIWLDNQN--PKSVAY 274     |
| Actinidia            | KAT-TVLINSFEELDP-ELNKVLNSN-FGKFLN     | IGPNSLTSHPHLSN              | -----SDEYGCIPWLAKOR--SASVAY 275    |
| Diospyros            | KAK-FLAVNSFEGLS-EASEVLNSN-FTKLLY      | IGPLNLCPAPATGPSSF           | -----SDEYGCILWLDK--PTSVAY 278      |
| Iris_2               | RSTTIILNSFEGLHP-EIDADLAKFR-KPLP       | IGPLNLFFSPAVP               | -----EPVSSSRCLAWLDDKFE--PDVVY 282  |
| Hordeum              | KAAIAVALNTFPGLDPPDLIAALAEALP-NCL      | PLGPYHLLPGAEPATDNE          | --APADPHGCLAWLDRRP--ARSVAY 281     |

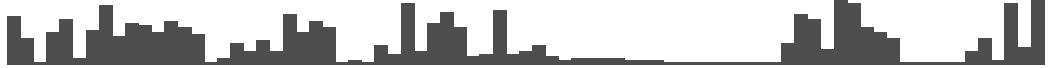

|                      | C1                                   |                      | PSPG MOTIF          |                         |                       |
|----------------------|--------------------------------------|----------------------|---------------------|-------------------------|-----------------------|
| Populus2             | VSFGSVITPPPHHELVALAEALETETPPFIWLSKDN | SKVHLPHGFLDRT        | ---SQGLVVPWSPQLEVL  | LAHRAVGVFVTHCG 350      |                       |
| Garcinia_mangostana  | VSFGSAIPLPHELVALAEALEDRKVPFIWLSKDN   | AKVHLPDGFLETHK       | ---FQGIWVPWAPQAKVL  | GKAVGVFVTHCG 354        |                       |
| Arabid7              | ISFGTVMTPPPGELAAIAEGLESKVPFVWLSKESL  | VQLPKGFLDRT          | ---EQGIVVPWAPQVELL  | KKHEATGVFVTHCG 358      |                       |
| Rosa_1               | VSFGSVIRPSPPELMALAEALEASRVPPFLWLSR   | NLMTPKLDDEFISKAE     | ---LNGMVVPWVPPQVLA  | HGSGVGAFTVTHCG 366      |                       |
| Citrus_paradisi      | VSFGTVAITPSPNEIVAIAEALEANKVPFIWLSR   | HRSQANLPLNGFLERT     | ---SDGIVVDWAPQVNVLA | HAHRAVGVFVTHCG 365      |                       |
| Dianthus_1           | VSFGSVARPDATETIATAQALEASQVKFIWLSI    | RDLKLVHLPGGFIENIK    | ---DKGMVVSWPQTA     | VLAKHRAVGVFVTHCG 357    |                       |
| Petunia_2            | IGFGTVAITPPPNELKAMAEALEESKTPPFLWLS   | KDLFKSFFPEGFLERTS    | ---EYGKIVSWAPQVVL   | SHGSGVGFVTHCG 348       |                       |
| Lobelia_erinus       | IGFGTVAITPPPHHELVALAEALEESGTPPFLW    | SINENSKKHLPEGFLERTG  | ---ENGKLVWAPQVQVLA  | HGSGVGFVTHCG 351        |                       |
| Rosa_2               | ISFGSVIRPPPHHELAFAEALIESAFPFIWLSFR   | GNPDDILPKGCDKSS      | ----LNGKLVSWAPQV    | QILEHAHRAVGVFVTHCG 355  |                       |
| Rosa_3               | ISFGSVGALPPMEVAALAEALEEGFPFLWLSFR    | GNLED-FPKGFIERT      | ----STGRVVPWNQV     | QVILNHPISIGVFTVTHCG 358 |                       |
| Populus3             | ISFGSVITLPPQELAEALVEALKECKLPFLWLS    | FRGNPKPEELPEEFLERTK  | ---EKGKVVSWTIPQ     | LKVLRHKAIGVFTVTHCG 350  |                       |
| Forsythia_intermedia | ISFGTVMTPPREMAGLAEALETGEFPFLWLSLR    | DNAMKLLPDGFLDRTS     | ---KFGMIVSWAPQ      | LKVLNHPISVGAFTVTHCG 350 |                       |
| Perilla_3            | ISFGTVMTPPELAAALADALEAICRFPPFLWLS    | LKDYAVKSLPDGFLDRTK   | ---GFGKIVAWAPQV     | LAHRNVGVFTVTHCG 343     |                       |
| Gentiana_triflora    | ISFGTVMNPPPNEMAALASTLESRKIPFLWLSR    | DEARKHLPENFIDRTS     | ---TFGKIVSWAPQ      | LHVLENPAIGVFTVTHCG 350  |                       |
| Solanum_tuberosum    | ISFGTVMTPPPNEIIAIAEALDEKMTFVWLSR     | DNGVKILPKGFLERTK     | ---EYKIIISWAPQ      | LEILAHRSVGVFTVTHCG 343  |                       |
| Dianthus_2           | ISFGTVAITPPPHHELVALAEALEESGDPFVW     | SMSDSVRAKNEPFIQNEP   | KVGVKIVSWAPQ        | LEILGHPISVGVFTVTHCG 358 |                       |
| Vigna_mungo          | VSFGTVMTPPPHEIVAVAEALEASGFPFLWLS     | LKHLKGVLPNGFLERTS    | ---ERKVVGWAPQ       | TVLGHGSGVGFVTHCG 354    |                       |
| 3WC4_Clitorea        | VSFGTVMTPPPQEVVAVAEALEESGFPFWALK     | ESLILPKGFVERTS       | ---TRKVVSWVPP       | SHVLSHGSGVGFVTHCG 345   |                       |
| HBF_MED_B            | ISFGSVITPPPHHELVALAEALEESGFPFIW      | SFRGNPKPEELPEEFLERTK | ---TKGKIVAWAPQ      | LEILGHPISVGVFTVTHCG 354 |                       |
| C1Z_VIT_B            | ISFGTVMTPPPAEVVALSEALEASRVPPFIW      | LSRDKARVHLPFGFLERTK  | ---GYGMVVPWAPQ      | AEVLAHRAVGAFTVTHCG 352  |                       |
| Populus_1            | ISFGSVITPPPHHELVALAEALETSGVPFIW      | LSKDNKSVHLPNGFLDRT   | ---SQGLVVPWTPQ      | MEVLAHRAVGVFTVTHCG 351  |                       |
| Fragaria             | VSFGSVIRPSPPELMALAEALEASRVPPFLW      | LSRDLNKLNPQDLFSGK    | ---LNGMVVPWAPQ      | VLAHGSVGAFTVTHCG 362    |                       |
| Litchi               | IGFGSVIRLPPNEIVAVAEALEASKLPFIW       | LSKKNLQADLPN         | ----RK              | ---LNGIMVEWAPQ          | LDVLAHNAVGVFINHGG 349 |
| Prunus               | VSFGSVARPEKELMAMAQALEASGVPFLW        | LPKDSFKTPLNELLIKA    | ----TNGMVVPWAPQ     | RRVLAHRSVGAFTVTHCG 370  |                       |
| Eustoma              | IGFGTVAITPPPELKLAEALVDIKTPFLW        | LSKDNMRSHLPEGFSERSG  | ---ETGKIVWAPQ       | VKILEHRSVGVFINHCG 349   |                       |
| Aralial              | IAFGTVAITPPPNELVSLAEALEESGTPPFLW     | SKDNFKNHLPKGFLERTS   | ---KSGKIVAWAPQ      | IQVLSHDAVGVFTVTHCG 351  |                       |
| Actinidia            | IGFGSVAKPKPDEVVAIAEALEASGTPPFLW      | SRDTSKQYLPFGFLERTS   | ---ELGKIVWAPQ       | VQVLAHRSIGVFTVTHCG 352  |                       |
| Diospyros            | IGFGTVMTPPLADDELVALANALEARAMPFLW     | SIKDSLKHLPEKLEKMN    | ---RTGKMVPWTPQ      | VQVLAHRSVGVFTVTHCG 355  |                       |
| Iris_2               | VSFGTVMTPPLPSELAEALGLSESFPFLW        | SIKDPKAKLPAGFLDRT    | ---RGLLVWIPQ        | VAVLHNNAVAFLSHCG 359    |                       |
| Hordeum              | VSFGTVMTPARPDELQELAEAGLEASGAPFLW     | SLRG-VVAAAPRGFLERAP  | ----GLVVWAPQ        | VGLRHAHRAVGAFTVTHAG 355 |                       |

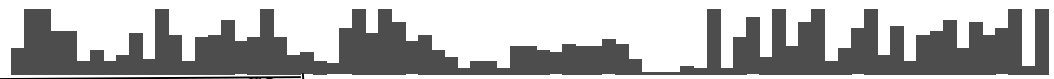

|                      | C2                          |                        | PSPG MOTIF             |                         |
|----------------------|-----------------------------|------------------------|------------------------|-------------------------|
| Populus2             | WNSLLESIAAGVPMICRPFPGDQRLN  | GRMIEDVWEIGLKVEDG-VFTK | LEVLNLSLNKILSHEG-GQKMR | ENIRALKQLAK 428         |
| Garcinia_mangostana  | WNSLLETIVGGVPMICRPFYGDQRLN  | NARMIGDVWIKGIVVNGG-VL  | AKEAMIDCFDKILLQED-GQ   | KMRGRIKSLKDLAL 432      |
| Arabid7              | WNSVLESVSGGVPMICRPFYGDQRLN  | GRAVEVWVEIGMTIING-VFT  | KDGFCEKLDKVLVQDD-GK    | KMKNAKLLKELAY 436       |
| Rosa_1               | WNSVLESLAGGVPMICRPFYGDQRLN  | ARMVDEWIKGLKLEGG-VFT   | KNGMLKSLDILLSQKK-GN    | IMRDTINTFKQLAQ 444      |
| Citrus_paradisi      | WGSILESIAGVPMICRPFYGDQRLN   | GRMEEQVWGVAVDGGGICT    | KEGLSSLDLILCOEK-GIK    | IREKVTKQLCQ 444         |
| Dianthus_1           | HNSIMESIASEVPMICRPFYGEQ     | LNRIEAKWCIGLVVEGG-VFT  | KDGLVLSLNKILGSTQ-GE    | EMRNIRDLRLMVD 435       |
| Petunia_2            | WNSVLESIAAGVPMICRPFYGDQRLN  | ARMVDEWIKGLKLEGG-VFT   | KDGTMLALDLVLSKDKR      | TELKQIGMYKBLAL 427      |
| Lobelia_erinus       | WNSVLESIGAGVPMICRPFYGEQ     | LNTRMVENVWRIQVVRKGG    | -VFTRSQTVQALEEVLH      | Q-KGKKLKEQVVVKELAH 429  |
| Rosa_2               | WNSLLESIVGGVPMICRPFYGDQRLN  | MRVETVWIGVVEGG-VLTK    | HCAIKALELILRGKA-GN     | EMREKIKVKNLQ 433        |
| Rosa_3               | WNSVLESICGVPMICRPFYADQRLN   | MRVVEWVKIGRIEGG-VFT    | KSGAIKVLQALSLEQ-GK     | EMRQVGVKQLAQ 436        |
| Populus3             | WNSVLESIAAGVPMICRPFYGDQRLN  | TRITEAVWTEGLEIEGG-RI   | TKGGLMKALRLIMSTDE      | -GNKMRKQLHQLGLAL 428    |
| Forsythia_intermedia | WNSILESIISVPMICRPFYGDQRLN   | SKMVEDVWIKGVRLEGG      | -VFTKNGTIEALHSVMLNET   | -GKAIRENINKLKRKAQ 428   |
| Perilla_3            | WNSILESISSVPMICRPFYGDQRLN   | SRMVQDSWKIGVRVEGG      | -VFTKNEAVESLKKLMATEA   | -GMKIRENVSLLEKAT 421    |
| Gentiana_triflora    | WNSLLESIFCRVPMICRPFYGDQRLN  | ARMVEDVWIKGVRVEGG      | -VFTEDETRVLELVLFS      | DK-GKEMRONVGRLEKAK 428  |
| Solanum_tuberosum    | WNSILEGISVPMICRPFYGDQRLN    | SRMVESVWEIGLQIEGG      | -NFTKSGTISALSTFFNEEK   | -GKVLKRVVEGLKEKAL 421   |
| Dianthus_2           | WNSIMESISTGVPMICRPIIGDQ     | ELNQRIVEIELKFGIGIEGG   | -CFTQSGTTNALNQVLASEK   | -GEEMRNVEELKKLAE 436    |
| Vigna_mungo          | CNSVFESMSNGVPMICRPFYGDH     | LTRMVEDVWEIGVRVEGG     | -VFTKDGLLSLRLILVEEE    | -GNLMKKNAVKVKIVL 432    |
| 3WC4_Clitorea        | ANSVMEISVNGVPMICRPFYGDQ     | HAARVQDIWEVGVIVEGK     | -VFTKNGFVKSLLNLILVQED  | -GKKIRDALKVKQIVQ 423    |
| HBF_MED_B            | WNSVLEICVGGVPMISRPFFGDQ     | LNITLIESVLEIGVVDNG     | -VLTRESIKKALELIMSSEK   | -GGIMRQKIVKLKESAF 432   |
| C1Z_VIT_B            | WNSLWESVAGGVPMICRPFYGDQRLN  | GRMVEDVLEIGVRIEGG      | -VFTKSGMLSCFDQILSQEK   | -GKLLRENLRALRETAD 430   |
| Populus_1            | WNSLLESIAAGVPMICRPFYGDQRLN  | GRMVEDAWKIGLQVEDG      | -VFRKHGVLNLSLQVLSQDS   | -GEEMRENIRALQQLAK 429   |
| Fragaria             | WNSVLESVAGGVPMICRPFYGDQRLN  | ARMVEDVWIKGLRLEGG      | -VFTKNGMLKSLDMLLSQDK   | -GTKMKNKIHTLQQLAQ 440   |
| Litchi               | WSSLMESMACGVPMICRPFYGDQRLN  | ARMVEDWIKGVSVEGG       | -IITKRGFLRSLDLILWQEN   | -GKMKRENVRKFKQLAE 427   |
| Prunus               | WSSLLETIAGGVPMICRPFYGDQRLN  | ARLVEDVLEIGATVEDG      | -VFTKHGMIKYFDQVLSQQR   | -GKLLRENINTVKLLAR 448   |
| Eustoma              | WNSVMEISIAAGVPMICRPFYGDH    | QLNTRMVEKVVQIGLRIEGG   | -VFTKDATNRALVVFVFSHEK  | -GKKIKQVVAVKLLAL 427    |
| Aralial              | WNSVLESIAAGVPMICRPFYGDH     | INTMVENVWIKGVRVEGG     | -VFTRTGTNNALEQVLLSQEK  | GKLLKEQITVFKELAL 430    |
| Actinidia            | WNSVLETIAGGVPMICRPFYGDH     | PMNTMVENVWIKGVRVEGG    | -VFTKSSIMRALELVLSHE    | -KGKLLKQDIGHLRELAL 430  |
| Diospyros            | WNSVLESIAAGVPMICRPLFGDQRLN  | SKVVSQVWKGVRLEGG       | -VFTKDGITRALDLVLEAE    | -GKLLKENAEWFKELIAH 433  |
| Iris_2               | WNSVLESMTICGVPMICRPLFGDQRLN | SKVVSQVWKGVRLEGG       | -PMTSTNVAEAIKTVVAGDE   | -GKNMRDRAAKMREKAT 437   |
| Hordeum              | WASVMEGVSSGVPMACRPFYGDQRLN  | ARSVASVWGFATFDG        | -PMTIRGAVANAVATLLR     | GED-GERMRAKQELQAMVG 432 |

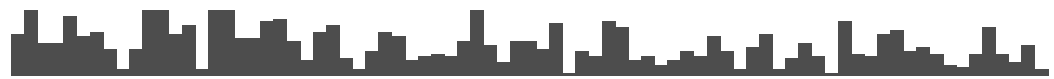

```

      :      *      :
Populus2      KAIGPN-GSSINNFIALSNLVFNKI--- 453
Garcinia_mangostana AATAVK-GSSSDNMRELSRLVSSPCK--- 457
Arabid7      EAVSSK-GRSSENFRLGLDAVVNI--- 460
Rosa_1      QAVEPK-GSSTRNFESLLEVISTAN--- 468
Citrus_paradisi NAIGPG-GSSMQNLDALVDMISRSY--- 468
Dianthus_1   KALSPD-GSCNTNLKHLVDMIVTSN--- 459
Petunia_2   NAVGPS-GSSAENFKKLVDIITSCN--- 451
Lobelia_erinus KAVGPS-GSSTENFKTLLEIITNMQSAT 457
Rosa_2      SAVEGD-GSSSKAFNCLVDIATNHEEV-- 459
Rosa_3      ETVGPN-GSSAQDLKVV----- 452
Populus3    DAVQSS-GSSTKNFETLLEVVAK----- 450
Forsythia_intermedia NAVKFD-GTSTKNFRALLELIKSPRGI-- 454
Perilla_3   AAVKPE-GSSSQNFKKLLEIIGAESS-- 447
Gentiana_triflora DAVKAN-GSSTRNFESLLAAFNKLDL-- 453
Solanum_tuberosum EAVKLDN-GSSIENFKVLVELVKCHKLT-- 448
Dianthus_2  ESVKQG-GSSNENFNALIELITSS---- 459
Vigna_mungo DAAGAQ-GKAAQDFNTLVELVSR----- 455
3WC4_Clitoria DAVGPH-GQAAEDFNTLVEVISS----- 446
HBF_MED_B   KAVEQN-GTSAMDFTLLIQIVTS----- 454
C1Z_VIT_B   RAVGPK-GSSTENFITLVDLVSKPKDV-- 456
Populus_1   KAIGPN-GSSINNFVSLSDLV----- 449
Fragaria    QAVEPK-GSSTRNFESLLEMATTN----- 463
Litchi      TAVGPQ-GSSMKNFKALVDIVSRPNDL-- 453
Prunus      QSVEPK-GGSAQNFKLLLDVISRSTKV-- 474
Eustoma     EAVGPN-GSSTKGFQAMVEVISTCQ---- 451
Aralial     KAVGPN-GSSTQNFKRLLLEVITT----- 452
Actinidia   KAVGPK-GSSSQNFNNLLEVITGHNL--- 455
Diospyros   KAAGKN-GSSTRSFDLVSRAQKDL--- 459
Iris_2      GSVRPD-GSSVRNLNTLLEIVFAR----- 460
Hordeum     KAFEPD-GGCRKNFEDEFVIVCRV----- 455
.....490.....500.....

```

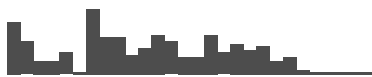

Supplement: pone.0092636.s001.pdf [file pone.0092636.s001.pdf]
