# Supplementary material for: In-Silico Analysis of Binding Site Features and Substrate Selectivity in Plant Flavonoid-3-O Glycosyltransferases (F3GT) through Molecular Modeling, Docking and Dynamics Simulation Studies
Source: PubMed Central journal article supplement (PMC3965439; doi:10.1371/journal.pone.0092636), 2014-03-25
Supplement: pone.0092636.s002.pdf [file pone.0092636.s002.pdf]

Figure S2 Multiple sequence alignment between query (30F3GTs) and template (PDB ID: 2C1Z, 3HBF and 3WC4) generated by ClustalX

|           |       |       |          |                                                                                           |              |  |
|-----------|-------|-------|----------|-------------------------------------------------------------------------------------------|--------------|--|
| Actinidia |       |       |          | . . . : *****.*.*.*. *:::*. **.. *::.*: * : * : *                                         | *** * : **.* |  |
| 2C1Z_A    | PDBID | CHAIN | SEQUENCE | MLITKSSSE---CHVAVLAFPFSTHPGPLLNLVORLAVEADPVIFSFISTAKSNESLFS---VPNPENIKPYVWDGVP            | 73           |  |
| 3HBF_A    | PDBID | CHAIN | SEQUENCE | --MSQTITN---PHVAVLAFPFSTHAAPLLAVRRLAAAAPHAVFSFFSTSQSNASIFHDSMHTMQCNIKSYDISDGVP            | 74           |  |
|           |       |       | SEQUENCE | MSIFKNEMNGNNLLHVAVLAFPFSTHAAPLLSLVKKIATKAPKVTFFSFFCTTTNDTLFARSNEFLP-NIKYYNVHDGLP          | 79           |  |
|           |       |       |          | 1.....10.....20.....30.....40.....50.....60.....70.....80                                 |              |  |
| Actinidia |       |       |          | :*** .:*:* * * * : . :*: : . *::: : : : **.*.*.* * * * : * * . * : * * *                  |              |  |
| 2C1Z_A    | PDBID | CHAIN | SEQUENCE | EGYVVFAGKPOEDINLFLKVAAGKFKLAMQAVEVETGRRTGWVMAADFLWFSSDMAEERGIPWVPWMSGACSLVHLYTD           | 153          |  |
| 3HBF_A    | PDBID | CHAIN | SEQUENCE | EGYVVFAGRPOEDIELFTRAAPESFRQGMVAVAETGRPVVSLVADAFIWFADMAEMGVAWLPFWTAGPNSLSTHVTID            | 154          |  |
|           |       |       | SEQUENCE | KGYVSSGNPREPIFLFKAMQENFKHVIDEAVAETGKNITCLVTDAFFWFGADLAEMHAKWVPLWTAGPHSLLTHVYTD            | 159          |  |
|           |       |       |          | .....90.....100.....110.....120.....130.....140.....150.....160                           |              |  |
| Actinidia |       |       |          | ***. * . : . : . : : : * : * : : * . * : * : : * : * : * : * : * : * : * : * : * : * : *  |              |  |
| 2C1Z_A    | PDBID | CHAIN | SEQUENCE | LIRETVGFSGISGRQNELLFKIPGFSSELRLGDLPSGVLLGNLKSPPFIMLHKIGQALPKAIVLINSFELDPELNKVLN           | 233          |  |
| 3HBF_A    | PDBID | CHAIN | SEQUENCE | EIREKIGVSGIQGREDELLNFIPGMSKVRFRDLQEGIVFGNLSLFSRMLHRMGVLPKATAVFINSFELDDSLTNDLK             | 234          |  |
|           |       |       | SEQUENCE | LIREKTGSKEVHDVKS--LDVLPGFPELKAADLPEGVK-DIDVPFATMLHKMGLELPANAVAINSFATIHPLIENELN            | 236          |  |
|           |       |       |          | .....170.....180.....190.....200.....210.....220.....230.....240                          |              |  |
| Actinidia |       |       |          | *:: * : * * * * : * : * : * : * : * : * : * : * : * : * : * : * : * : * : * : * : *       |              |  |
| 2C1Z_A    | PDBID | CHAIN | SEQUENCE | SNFGKFLNIGPNSLTSPPHLSNSDEYGCIPWLAKQRSAVAYIGFGSVAKPKPDEVVAIAEALASSTPFLWSLRDTSKQ            | 313          |  |
| 3HBF_A    | PDBID | CHAIN | SEQUENCE | SKLKTLYLNIIGPFNLI PPPVVPN-TIGCLQWLKERKPTSVVYISFGTVTTPPPAEVVALS EALASRVVPIWSLRDKARV        | 313          |  |
|           |       |       | SEQUENCE | SKFKLLLVGPFNLITPQRKVSDEHGCLQWLDSHENS SVVYISFGVVTPPPHELTALAESLEECGFPFIWSFRGDPKE            | 315          |  |
|           |       |       |          | .....250.....260.....270.....280.....290.....300.....310.....320                          |              |  |
| Actinidia |       |       |          | * : * : * : * * * * : * : * : * : * : * : * : * : * : * : * : * : * : * : * : * : * : *   |              |  |
| 2C1Z_A    | PDBID | CHAIN | SEQUENCE | YLPEGFLEKTRGYGMVVPWAPQAEVLAHEAVGAFVTHCGWNSLWESVAGGVPLICRPFPGDQRLNCRMVEDVLEIGVRIE          | 393          |  |
| 3HBF_A    | PDBID | CHAIN | SEQUENCE | KLEKGFLEKTRKTKGKIVAWAPQVEILKSSVGVFLTHSGWNSVLECVGGVPMISRPFPGDQGLNITLIVSLEIGVGVGD           | 393          |  |
|           |       |       | SEQUENCE | .....330.....340.....350.....360.....370.....380.....390.....400                          | 395          |  |
| Actinidia |       |       |          | * : * : * : * : * : * : * : * : * : * : * : * : * : * : * : * : * : * : * : * : * : * : * |              |  |
| 2C1Z_A    | PDBID | CHAIN | SEQUENCE | GGVFTKSSMTRALELVLSHEKGKKLDQIGHLRELALKAVGPKGSSSQFNFNLEVITG-HNL                             | 455          |  |
| 3HBF_A    | PDBID | CHAIN | SEQUENCE | GGVFTKSGLMSCFDQILSQEKGKLRLENLRALRETADRAGVPGKSSSTENFIILVDLVSKPKDV                          | 456          |  |
|           |       |       | SEQUENCE | NGVLTKESSIKKALELIMSSEKGGIMROKLVKLESFAKAVEQNGTSAMDFTLIIQIVTS---                            | 454          |  |
|           |       |       |          | .....410.....420.....430.....440.....450.....460.....                                     |              |  |





```

               :      :      * * * * *   * * * *   : : * * * *   . * * * *   : : * * * *   : * * * *   : * :
Citrus_paradisi      ----MAQTQSRPHIAVLNFPFSTHASSVLSIIKRLAVSAP TALFTFFSTPOSNKALFSTGOQRHLP SNVKPYDVS DGV      76
2C1Z_A | PDBID | CHAIN | SEQUENCE      ----MSQTITN--PHVAVLAFPFSTHAAPLLAVRRLLAAAAPHAVFSFFSTSQSNASIFHDS--MHTMQCNIKSYDISDGV      73
3HBF_A | PDBID | CHAIN | SEQUENCE      MSTFKNEMNGNLLHVAVLAFPGFTHAAPLLSLVKKIATTEAPKVTFFSFFCTTITNDLFRS--NEFLPNIKYINVHDGL      78
1.....10.....20.....30.....40.....50.....60.....70.....80

```

```

* * * * *   . * * * *   . * * * *   . * * * *   . * * * *   . * * * *   . * * * *   . * * * *   . * * * *   . * * * *   . * * * *
Citrus_paradisi      PEGHVFSGKROEDIELFMNAADANFRKAVEAAVAETGRPLTCLVTDAFIWFFAEMAREWNVPVWPCWPAGPNLSLAHLY      156
2C1Z_A | PDBID | CHAIN | SEQUENCE      PEGYVFAGRPOEDIELFTRAAPESFRQGMVAVAETGRPVSCLVADAFIWFADMAAEMG-VAWLPFFWTAGPNLSLTHVY      152
3HBF_A | PDBID | CHAIN | SEQUENCE      PKGYVSGNPREPIFLFIKAMQENFKHVIDEAVAETGKNITCLVTDAFFWFGADLAEEMH-AKWVPLWTAGPHSLLTHVY      157
.....90.....100.....110.....120.....130.....140.....150.....160

```

```

* * * * *   . * * * *   . * * * *   . * * * *   . * * * *   . * * * *   . * * * *   . * * * *   . * * * *   . * * * *   . * * * *
Citrus_paradisi      TDIIRDKIGTQ-SONQDQLTHFIPGMNKIRVADLPEGVVGDLDSVFSVMLHQMGRQLPKAAAVFINSFEELDPELTDNH      235
2C1Z_A | PDBID | CHAIN | SEQUENCE      IDEIREKIGVSGIOGREDELNFIPGMSKVRFRDLQEGIVFGNLSLFSRMLHRMGQVLPKATAVFINSEELDDSLTND      232
3HBF_A | PDBID | CHAIN | SEQUENCE      TDLIREKTGSK--EVHDVKSIDVLPGFPELKASDLEGVIK-DIDVPPFATMLHKMGLPRANAVAINSEFATHLIENE      234
.....170.....180.....190.....200.....210.....220.....230.....240

```

```

* : * * *   . * : * * *   . * : * * *   . * : * * *   . * : * * *   . * : * * *   . * : * * *   . * : * * *   . * : * * *   . * : * * *
Citrus_paradisi      LKTKFNKFLSVGPFLLLASDQQPSAIDLDEYGCCLAWLDRKQKKKPVAVYVSGFVATPSPNEIVAIAEALEANKVP      315
2C1Z_A | PDBID | CHAIN | SEQUENCE      LKSKLK-TYLNIGPFNLITPPPVVNTT-----GCLQWLKE--RKPTSVVYISFGTVTIPPPAEVVALSEALEASRVP      302
3HBF_A | PDBID | CHAIN | SEQUENCE      LNSKFK-LLLVGPFNLITPQRKVSDEH-----GCLEWLDQ--HENS SVVYISFGSVVTPPPHELTALAESLECGFP      304
.....250.....260.....270.....280.....290.....300.....310.....320

```

```

* * * * *   . * * * *   . * * * *   . * * * *   . * * * *   . * * * *   . * * * *   . * * * *   . * * * *   . * * * *   . * * * *
Citrus_paradisi      FIWSLRHRSQANLPNGFLERTRSDGIVVDWAPQVNVLAHEAVGVFVTHCGWSILESIAAGVPMIGRPFPGDQRINGRMM      395
2C1Z_A | PDBID | CHAIN | SEQUENCE      FIWSLRDKARVHLPFGFLEKTRGYGMVVPWAPQAEVLAHEAVGAFVTHCGWNSLWESVAGGVPLICRPFPGDQRLNHRMV      382
3HBF_A | PDBID | CHAIN | SEQUENCE      FIWSFRGDPKPKGFLERTKTKGKIVAWAPQVEILKHSVGVFVTHSGWNSVLECVGVPVMSRPFPGDQGLNTILT      384
.....330.....340.....350.....360.....370.....380.....390.....400

```

```

* . *   . * . *   . * . *   . * . *   . * . *   . * . *   . * . *   . * . *   . * . *   . * . *   . * . *   . * . *   . * . *   . * . *
Citrus_paradisi      EQVWGVAVDGGGICTKGLLSLDLILCOEKGIKIREKVTKLKQLCQNAIGPGGSSMONLDALVDMISRYS--      468
2C1Z_A | PDBID | CHAIN | SEQUENCE      EDVLEIGVRIEGG-VFTKSGMLSCFDQILSOEKGKKLRENLRALRETADRAGPKGSSTENFITLVLDVSKPKDV      456
3HBF_A | PDBID | CHAIN | SEQUENCE      ESVLEIGVGVNDG-VLTKESIKKALELTMSEKGGIMRQKIVKLESFAKAVEQNGTSAADFNTLILQIVIS---      454
.....410.....420.....430.....440.....450.....460.....470.....

```



Dianthus\_2  
2ClZ\_A | PDBID | CHAIN | SEQUENCE        \*: ..            \*\*\* \*\*\*\*\* ..... :\*.. :\*\*\* . :\* :\*\*        : \*\* \*:: .  
MTTNNVEPPRR--HIAVCAF PFGTHAAP LLLLARRLS TATPDTRYTFNVERSN TALFKAIDVSVGSNIVPYNITLSNE        78  
3HBF\_A | PDBID | CHAIN | SEQUENCE        MSQT TNF-----HVAVLAF PFS THAAPLLAVRRLAAAAPHAVFSFFS TSQSNASIFHD SMHMTQCNIKSYDISDGVP        74  
3HBF\_A | PDBID | CHAIN | SEQUENCE        MSTFKNEMNGNLLHVAVLAF PFGTHAAPLLSLVKKIAT EAPKVTFFFFCTTTNDLFSRSNEFLP-NIKYYNVHDGLP        79  
1.....10.....20.....30.....40.....50.....60.....70.....80

Dianthus\_2  
2ClZ\_A | PDBID | CHAIN | SEQUENCE        AP AAGPGNP MKAIEEFLEHSPGGFRAMEEVEAHVGVKTSIIISDAFLWYCS DIAEEKGLDWIALWTAGTASLSAHLTYD        158  
3HBF\_A | PDBID | CHAIN | SEQUENCE        EGYVFAGRPOEDIELFTRAAPESFRQGMVAVAETGRPVSVCLVADAFIWFADMAEMGVAWLPFWTAGPNSLSTHVTID        154  
3HBF\_A | PDBID | CHAIN | SEQUENCE        KGYVSSGNPREPIFLFIKAMQENFKHVIDEAVAETGKNI TCLVTD AFWFAGDLAEEMHAKVWPLWTAGPHSLLLHVYTD        159  
.....90.....100.....110.....120.....130.....140.....150.....160

Dianthus\_2  
2ClZ\_A | PDBID | CHAIN | SEQUENCE        AIRALASDNQEGEGKEDVLSI PGLSNVRI SDLP MGLVSGDLLDAFP QMLHMGMTMLPKAKVVTLNVFQELSPLVVNDLN        238  
3HBF\_A | PDBID | CHAIN | SEQUENCE        EIREKIGVSGIQGREDELLNFIPGMSKVRFRDLQEGIVFGNLSLFRMLHRMGQVLPKATAVFINSFELDDSLTNDLK        234  
3HBF\_A | PDBID | CHAIN | SEQUENCE        LIREKTGSKEVHDVKS--IDVLPGFPEL KASDLPEGVIK-DIDVFPATMLHMGLELPRANAVAINSFATIHPLIENLN        236  
.....170.....180.....190.....200.....210.....220.....230.....240

Dianthus\_2  
2ClZ\_A | PDBID | CHAIN | SEQUENCE        SKLK-LLCVGPFP L CPPQVYS DPNCLDWLDQHGPKIAYISFGTVA TP PPHEIRALAKALEGSDIPFVWMSDSVVRAN        317  
3HBF\_A | PDBID | CHAIN | SEQUENCE        SKLKYIYLNIGPFLNI PPPVVPNTTGCLOWLKERKPTSVVYISFGTV T PP PAEVVALSEALEASRVPFIWSLRDKARVH        314  
3HBF\_A | PDBID | CHAIN | SEQUENCE        SKFKLLLNVGPFNLITPQRKVSDEHGCLEWLDQHENSSVYIISFGSVVTPPPHEL TALAESLEECGFPIWSFRGDPKEK        316  
.....250.....260.....270.....280.....290.....300.....310.....320

Dianthus\_2  
2ClZ\_A | PDBID | CHAIN | SEQUENCE        LPESFIEKIQNEPKVGKIVSWAPQIKLLGH PSTGVFVTHCGWNSIMESISTGVPLICRPIIGDQELNQRIVEIELKFGIG        397  
3HBF\_A | PDBID | CHAIN | SEQUENCE        LPEGFLEKTRG---YGMVVPWAPQAEVLAHEAVGAFVTHCGWNSLWESVAGGVPLICRPPFGDQRLNRMVEDVLEIGVR        391  
3HBF\_A | PDBID | CHAIN | SEQUENCE        LPKGFLERTKT--KGVIVAWAPQVEILKHS SVGVFLTHSGWNSVLECVVGGVPMISRPFPGDQLNTILTESVLEIGVG        393  
.....330.....340.....350.....360.....370.....380.....390.....400

Dianthus\_2  
2ClZ\_A | PDBID | CHAIN | SEQUENCE        IEGGCF TQSGL TNALNQVLA SEKGEEMRKNVEELK KLAESVKGGSSNENFNALIELITSS---        459  
3HBF\_A | PDBID | CHAIN | SEQUENCE        IEGGVFKSGLMSCFDQILSQEKGKLRNLRALRETADRAGPKGSSSTENFITLVDLVSKPKDV        456  
3HBF\_A | PDBID | CHAIN | SEQUENCE        VNDNGVLKESIKKALELITMSSSEKGGIMRKIVKLKESAFKAVEQNGT SAMDF TLLIQIVTS----        454  
.....410.....420.....430.....440.....450.....460.....

```

: . ***** . * * * * * : * * * * * : * * * * * : * * * * * : * * * * *
Diospyros -----MADSSPHQHVAVLAFPFSSHPGLRRIVCWLAAAAADVTFSTFYTTAESNKSLFSAAPAP---ANVKAFVSDGVP 71
2C1Z_A | PDBID | CHAIN | SEQUENCE -----MSQTTNPHVAVLAFPFSTHAAPLLAVRRRLAAAAAPHAVFSFFSTSQSNASIFHDSMHTMCCNIKSYDISDGVP 74
3HBF_A | PDBID | CHAIN | SEQUENCE MSTFKNEMNGNLLHVAVLAFPFSTHAAPLLSLVKKIAEAPKVTFFSFFCTTTINDLFRSNE-FLPNIKYYNVHDGLP 79
1.....10.....20.....30.....40.....50.....60.....70.....80

: * * * * * : * * * * * : * * * * * : * * * * * : * * * * * : * * * * * : * * * * *
Diospyros EGYVFSGKPOEDINLFLEAGYRSCRKAVKAAEAETIGRRITSCLMADAFWLWFSGLDAEEMGVAVIPVWTSVCSFVHFYTD 151
2C1Z_A | PDBID | CHAIN | SEQUENCE EGYVFAGRPOEDIELFTRAAPESFRQGMVAVAETGRPVVSLVADAFIWFADMAAEMGVAVLPFWTAGPNSLSTHVYTD 154
3HBF_A | PDBID | CHAIN | SEQUENCE KGYVSSGNPREPIFLFIKAMQENFKHVIDEAVAETGKNITCLVTDAFFWFGADLAEMHAKVWVPLWTAGPHSLLTHTVYTD 159
.....90.....100.....110.....120.....130.....140.....150.....160

* * * * * : * * * * * : * * * * * : * * * * * : * * * * * : * * * * * : * * * * *
Diospyros LIRDVTGINALAGREDEIVKFIPIGFSGGVRLGDLPSGVLFGLNLDSTFAVMLHKMGKVLQAKFLAVNSFEGLESEASEVL 231
2C1Z_A | PDBID | CHAIN | SEQUENCE EIREKIGVSGIQGREDELLNFIPIGMS-KVRFRDLEQEGIVFGNLSLFSRMLHRMGQVLPKATAVFINSEELDDSLTNDL 233
3HBF_A | PDBID | CHAIN | SEQUENCE LIREKTGSKEVHDVKS--LDVLPGF-ELKASDLPEGVIK-DIDVPFATMLHKMGLELPRANAVAINSFATIHPLIENEL 235
.....170.....180.....190.....200.....210.....220.....230.....240

: * * * * * : * * * * * : * * * * * : * * * * * : * * * * * : * * * * * : * * * * *
Diospyros NSNFTKLLYIGPLNLCPPAPATGSSFSDEYGCCLKWLD SQKPTSVAVIGFGTVGLAPDELVALANALEARAMPFLWSIK 311
2C1Z_A | PDBID | CHAIN | SEQUENCE KSKLKYLNIGPFNLITPPPVP-----NTTGCLQWLKERKPTSVVYISFGIVTTPPPAEVVALSEALEASRVPFIVSLR 308
3HBF_A | PDBID | CHAIN | SEQUENCE NSKFKLLLVGPFNLITPQRKVS-----DEHGCLWLDQHENS SVVYISFGSVVTPPPHELTALAESLECGFPFIWVSR 310
.....250.....260.....270.....280.....290.....300.....310.....320

. . : * * * * * : * * * * * : * * * * * : * * * * * : * * * * * : * * * * * : * * * * *
Diospyros DSLKHLPEKLLKMNRTGKMPVWTPQVQVLAHVSVGVFITHFGWNSVLESIAAGVPLIGRPLFGDHQLNGWMAEHVVRV 391
2C1Z_A | PDBID | CHAIN | SEQUENCE DKARVHLEGFLEKTRGYGMVVPWAPQAEVLAHEAVGAFVTHCGWNSLWESVAGGVPLICRPFPGDORLNGRMVEDVLEI 388
3HBF_A | PDBID | CHAIN | SEQUENCE GDPKEKLEKGFLEKTRKGIKIVAWAPQVEILLKSSVGVFLTHSGWNSVLECIVGGVPMISRPFPGDQGLNTILLESVLEI 390
.....330.....340.....350.....360.....370.....380.....390.....400

* * : * * * * * : * * * * * : * * * * * : * * * * * : * * * * * : * * * * *
Diospyros GVKVEGGVFTKDGITIRALDLVLLAEAGKLLKENAEWFKEIAHKAAGKNGSSTRSFDLTKSVRAQKDL 459
2C1Z_A | PDBID | CHAIN | SEQUENCE GVRIEGGVFTKSGLMSCFDQILSQEKGGKLLRENLRALRETADRAGVPGKSSITENFILLVDLVSKPKDV 456
3HBF_A | PDBID | CHAIN | SEQUENCE GVGVDNGVLTKESSIKKALELIMSSEKGGIMROKIVLKEAFKAVEQNGTSAAMDFTLIIQIVTIS--- 454
.....410.....420.....430.....440.....450.....460.....

```

```

Eustoma          . :          ****:****:****. **.:*:* *.. ****.* : * ::* : *** :*: **
2C1Z_A | PDBID | CHAIN | SEQUENCE  ---KIQK-----HVAVMAFPFAHAGLLGLLHRLLAGALPNVMFSAFFSTAKSNASLFSG-KSPIQLNPKPFDIQDGV 69
3HBF_A | PDBID | CHAIN | SEQUENCE  MSQTITNP-----HVAVLAFPFSTHAAPLLAVVRRLLAAAAPHAVFSFFSTSQSNASIFHD SMHTMOCNKSVDISDGV 74
3HBF_A | PDBID | CHAIN | SEQUENCE  MSTFKNEMNGNLLHVAVLAFPFSTHAAPLLSLVKKIATEAPKVTFFSFFCTTTNDLFR-SNEFLPNIKYYNVHDGLP 79
1.....10.....20.....30.....40.....50.....60.....70.....80

:*** :*:* * * * * * * * * * * * * * * * * * * * * * * * * * * * * * * * * * * * * * * * * * * * * * * * * * * * *
Eustoma          :*** :*:* * * * * * * * * * * * * * * * * * * * * * * * * * * * * * * * * * * * * * * * * * * * * * * * * * * * *
2C1Z_A | PDBID | CHAIN | SEQUENCE  EGYVFSGRPOEDIDLFLKAAPEFRKELKVAEEVVGIVKSCVMADAFWLWFSGEMAEVGGCWVPVWTSAGAGSLVHVHTE 149
3HBF_A | PDBID | CHAIN | SEQUENCE  EGYVFAGRPOEDIELFTRAAPESFRQGMVAEETGRPVVSLVADAFIWFADMAEMGVAWLPFWTAGPNSLSTHVYID 154
3HBF_A | PDBID | CHAIN | SEQUENCE  KGVVSSGNPREPIFLFIKAMQENFKHVIDEAVAETGKNITCLVTDAFFWFGADLAEMHAKWVPLWTAGPHSLLTHTVYTD 159
.....90.....100.....110.....120.....130.....140.....150.....160

***. * . : . : . : . : * * * * * * * * * * * * * * * * * * * * * * * * * * * * * * * * * * * * * * * * * * * * * * * * * * * *
Eustoma          ***. * . : . : . : * * * * * * * * * * * * * * * * * * * * * * * * * * * * * * * * * * * * * * * * * * * * * * * * * * * *
2C1Z_A | PDBID | CHAIN | SEQUENCE  LIRETIGLNGVAGREDEILKFI PGFS ELRLGDLPSGVVFGNLESPPFAVMLHRMGQTL SKASALPINSFEELDPPLIQDLK 229
3HBF_A | PDBID | CHAIN | SEQUENCE  EIREKIVSGIQGREDELLNFI PGMSKVRFRDLQEGIVFGNLSLFSRMLHRMGQVLPKATAVFINSFEELDDSLTNDLK 234
3HBF_A | PDBID | CHAIN | SEQUENCE  LIREKTGSKEVHDVKS--IDVLPGFPELKASDLPEGVIK-DIDVPPFATMLHRMGLELPRANAVAINSFATIHPLIENELN 236
.....170.....180.....190.....200.....210.....220.....230.....240

**.* **:* **:* * * * * * * * * * * * * * * * * * * * * * * * * * * * * * * * * * * * * * * * * * * * * * * * * * * * *
Eustoma          **.* **:* **:* * * * * * * * * * * * * * * * * * * * * * * * * * * * * * * * * * * * * * * * * * * * * * * * * * * * *
2C1Z_A | PDBID | CHAIN | SEQUENCE  SKFKNVLNVGPFNLTSPPIANTDIHGCI PWLQKSPRSVVYIGFGTVAIPPPPELKALAEALVDITKTPFLWSLKDNMR 309
3HBF_A | PDBID | CHAIN | SEQUENCE  SKLKTLYLNI GPFNLTIPPPVVPNT--TGCLQWLKERKPTSVVYISFGTVP TPPPAAEVVALSEALEASRVFFIWSLRDKAR 312
3HBF_A | PDBID | CHAIN | SEQUENCE  SKFKLLLVGPFNLTTPQRKVSDE--HGCLQWLQCHENSSVVYISFGSVVTPPPHELTALAESLEECGFFFIWSFRGDPK 314
.....250.....260.....270.....280.....290.....300.....310.....320

:***: * * * * * * * * * * * * * * * * * * * * * * * * * * * * * * * * * * * * * * * * * * * * * * * * * * * *
Eustoma          :***: * * * * * * * * * * * * * * * * * * * * * * * * * * * * * * * * * * * * * * * * * * * * * * * * * * * *
2C1Z_A | PDBID | CHAIN | SEQUENCE  SHLPEGFSESGEIGKIVPWAPOVKILEHDSVGVFINHCGWNSVMESIAAGVPIICRPFPGDHQLNSWMVEKVVQIGLRI 389
3HBF_A | PDBID | CHAIN | SEQUENCE  VHLPEGFLEKTRGYGMVVPWAPOAEVLAHEAVGAFVTHCGWNSLWESVAGGVPLICRPFPGDORLNGRMVEDVLEIGVRI 392
3HBF_A | PDBID | CHAIN | SEQUENCE  EKLPKGFLEKTRTKGKIVAWAPOVEILKHS SVGVFLTHSGWNSVLECI VGGVPMISRPFPGDQGLNTILT ESVLEIGVGV 394
.....330.....340.....350.....360.....370.....380.....390.....400

:***: * * * * * * * * * * * * * * * * * * * * * * * * * * * * * * * * * * * * * * * * * * * * * * * * * * * *
Eustoma          :***: * * * * * * * * * * * * * * * * * * * * * * * * * * * * * * * * * * * * * * * * * * * * * * * * * * * *
2C1Z_A | PDBID | CHAIN | SEQUENCE  EGGVFTKDATNRALVVVFSHEKGGKIKEQVVAYKLALEAVGPNGSSTKGFQAMVEVISTCQ-- 451
3HBF_A | PDBID | CHAIN | SEQUENCE  EGGVFTKSGLMSCFDQILSQEKGKLLRENLRALRETADRAGPKGSSTENFITLVDLVSFKPKDV 456
3HBF_A | PDBID | CHAIN | SEQUENCE  DNGVLTRESIKKALELIMSSEKGGIMRCKIVKLESAPKAVEQNGTSAMDFTLLIQIVTS---- 454
.....410.....420.....430.....440.....450.....460....

```





```

Fragaria
2C1Z_A | PDBID | CHAIN | SEQUENCE MA--SNQAGG---HVAVLAFPFSTHAAPLLNIVCRLAAAAASTLFSFFNFKOSNSILASDTSVLRITNVVCCEVADGV 74
3HBF_A | PDBID | CHAIN | SEQUENCE MS--QTTINP---HVAVLAFPFSTHAAPLLAVRRRLAAAAAPHAVFSFFSISQSNASIFHDSMHTMQCN-IKSYDISDGV 73
1.....10.....20.....30.....40.....50.....60.....70.....80

```

```

Fragaria
2C1Z_A | PDBID | CHAIN | SEQUENCE PEGYVVFAGRPQEDIELFTRAAPESFRQGMVMAVAETGRFVSCLVADAFIWFADMAAEMG-VAWLPFWTAGPNSLSTHVY 154
3HBF_A | PDBID | CHAIN | SEQUENCE PEGYVSSGNPREPIFLFIKAMQENFKHVIDEAVAETGKNITCLVTDAFFWFADLAEMH-AKWVPLWTAGPHSLSTHVY 157
.....90.....100.....110.....120.....130.....140.....150.....160

```

```

Fragaria
2C1Z_A | PDBID | CHAIN | SEQUENCE TDLIRNTI--SGDCHDEKEITTVIAGMSKVRPQDLPEGIIFGNLESLSRMLHQMGLMLPLATAVFINSFEELEDDSLTND 232
3HBF_A | PDBID | CHAIN | SEQUENCE TDLIREKT--GSKEVHDVKSIDVLPGFPELKASDLPEGVIK-DIDVPPFATMLHKMGLELPRANAVAINSFATIHPLIENE 234
.....170.....180.....190.....200.....210.....220.....230.....240

```

```

Fragaria
2C1Z_A | PDBID | CHAIN | SEQUENCE LKSKFKRFLNVGPLDLEPTASAATTPQTAEAVAGDGCLSWLDKQKAASVVYVSGSVTRPSPPELMALAEALEASRVP 312
3HBF_A | PDBID | CHAIN | SEQUENCE LKSKFKLTLNIGPFNLITPPPVPVNTI-----GLOWLKERKPTSVVYISFGTVITPPPAEVVALSEALEASRVP 304
.....250.....260.....270.....280.....290.....300.....310.....320

```

```

Fragaria
2C1Z_A | PDBID | CHAIN | SEQUENCE FLWSLRDLNKNPQLDEFLSKGLNGMVVPWAPQPQVLAHGSVGFVTHCGWNSVLESVAGGVPLICRPFPGDQKLNARMV 392
3HBF_A | PDBID | CHAIN | SEQUENCE FIWSLRDKARVHLPFEGFLEKTRGYGMVVPWAPQAEVLAHEAVGAFVTHCGWNSLWESVAGGVPLICRPFPGDQRLNARMV 382
.....330.....340.....350.....360.....370.....380.....390.....400

```

```

Fragaria
2C1Z_A | PDBID | CHAIN | SEQUENCE EDVWKIGLRLEGGVFTKNGMLKSLDMLLSQDKGTKMKNKIHTLKQLAQQAVEPKGSSTRNFESLLEMATTN--- 463
3HBF_A | PDBID | CHAIN | SEQUENCE EDVLEIGVRIEGGVFTKSGMLMCFDQILSQEKGKLRLENLRALRETADRAGPKGSSTENFILLVDLVSKPKDV 456
.....410.....420.....430.....440.....450.....460.....470.....

```



```

** . *****:*.:.:*. ** . *:* : : * : * : * : *
Gentiana_triflora MS PVS-----HVAVLAF PFGTHAAPLLTLVNRLAASAPDIIF SFFSTSSSITIF SPTNLSIGSN IKPVAVWDGS 71
2C1Z_A | PDBID | CHAIN | SEQUENCE MS QTTNPF-----HVAVLAF PFS THAAPLLAVRRLLAAAAPHAVF SFFSTSSQSNASIFHDS -MHTMQCNIKSYDISDGV 73
3HBF_A | PDBID | CHAIN | SEQUENCE MS TFKNEMNGNLLHVAVLAF PFGTHAAPLLSLVKKIAIEAPKVTIF SFFCTTTTNDL LFRS --NEFLPNIKYVNVHDGL 78
1.....10.....20.....30.....40.....50.....60.....70.....80

*:*:*:*:*:* * * * * * : * : * : * : * : * : * : * : * : * : * : * : * : * : * : * : * : * : * : * : * : * : *
Gentiana_triflora PEGFVFS GNP REPIEYFLNAAPDNFDKAMKKA VEDTGVN ISCLLTD AFLWFAAD FSEKIGV P WIPVWVTAASC SLCLH VYT 151
2C1Z_A | PDBID | CHAIN | SEQUENCE PEGYVFAGRPQ EDIELFTRAAPESFRQGMVMAVAETGRFVS CLVADAFIWFADMAAEMGVAWLPFWTAGPNSLSTHVYI 153
3HBF_A | PDBID | CHAIN | SEQUENCE PKGYVSGNPREPIFLFIKAMQENFKHVIDEAVAETGKNITCLVTD AFFWF GADLAEEMHAKWVPLWTAGPHSL LTHVYT 158
.....90.....100.....110.....120.....130.....140.....150.....160

* * * : . : : : : * : * : * : * : * : * : * : * : * : * : * : * : * : * : * : * : * : * : * : * : * : *
Gentiana_triflora DEIRSRFAEFDIAEKA EKTIDFIPGLSAISFS DLP EELIMEDSQSIFAL TLHNMGLK LHKATAVAVNSFE EIDPIITNHL 231
2C1Z_A | PDBID | CHAIN | SEQUENCE DEIREKIGVSGIQGREDELLNFIPGMSKVFRFDLQEGIVFGNLSLFSRMLHRMGQVLPKATAVFINSFEELDDSLTNDL 233
3HBF_A | PDBID | CHAIN | SEQUENCE DLIREKIGSKEVHD--VKSIDVLPGFPELKASDLPEGVIK-DIDVFPATMLHKMGLLEPRANAVAINSFATIHPLIENEL 235
.....170.....180.....190.....200.....210.....220.....230.....240

.* : * : * : * : * : * : * : * : * : * : * : * : * : * : * : * : * : * : * : * : * : * : * : * : * : * : * : *
Gentiana_triflora RSTNQLN ILNIGP LQTLSSS-IPPE DNECLKWLQTKES SVVYLSFGT VINPPP NEMAALAS TLESRKIPFLWSLRDEAR 310
2C1Z_A | PDBID | CHAIN | SEQUENCE KSKLKT- YLNI GPFNLI T P P P V P N T T G C L Q W L K E R K P T S V V Y I S F G T V T P P P A E V V A L S E A L E A S R V P F I W S L R D K A R 312
3HBF_A | PDBID | CHAIN | SEQUENCE N E K F K L - L L N V G P F N L T P Q R K V S D E H G C L E W L D C H E N S S V V Y I S F G S V V T P P P H E L T A L A E S L E C G F F I W S F R G D P K 314
.....250.....260.....270.....280.....290.....300.....310.....320

* : * : * : * : * : * : * : * : * : * : * : * : * : * : * : * : * : * : * : * : * : * : * : * : * : * : * : *
Gentiana_triflora KHL PENFIDRSTIFGKIVSWAPQLHVLENPAIGVFVTHCGWNS TLESIFCRV PVI GRPFFG DQKVNARMVEDVWKIGVGV 390
2C1Z_A | PDBID | CHAIN | SEQUENCE VHLPEGFLEKTRGYGMVVPWAPQAEVLAHEAVGAFVTHCGWNSLWESVAGGVPLICRPFPGDQRLN GRMVEDVLEIGVRI 392
3HBF_A | PDBID | CHAIN | SEQUENCE EKLPKGFLEKTRKTKGKIVAWAPOVEILKHS SVGVFLTHSGWNSVLECI VGGVPMISRPFPGDQGLNTILTESVLEIGVGV 394
.....330.....340.....350.....360.....370.....380.....390.....400

* : * : * : * : * : * : * : * : * : * : * : * : * : * : * : * : * : * : * : * : * : * : * : * : * : * : * : *
Gentiana_triflora KGGVFEDETRVLELVLFEDKKGEMRONVGR LKEKAKDAVKANGSSTRNFESLLAAFNKLDS- 453
2C1Z_A | PDBID | CHAIN | SEQUENCE EGGVFTKSGMLSCFDQILSQEKGKLRNLRALRETADR AVGPKGSSTENFILLVDLVS KPKDV 456
3HBF_A | PDBID | CHAIN | SEQUENCE DNGVLTRESIKKALELIMSSEKGGIMRQKIVKLESAPKAVEQNGTSAMDFTILLIQVTS---- 454
.....410.....420.....430.....440.....450.....460....

```

```

Iris_2
2C1Z_A | PDBID | CHAIN | SEQUENCE | -MGSVEHP-----HIALLAFFPGTHAAPLLSLAHSLSAASAPPGTFFSFVSSRRRSVSLSLVSPSD-NIRFYEVS DGSFVLA PAAASGMLLEDP EEEVRLFMKEIFGNVRRAL EAAVEGCAGTRVT CIIADAF LWFVGEIAAENGVMVP | 142
3HBF_A | PDBID | CHAIN | SEQUENCE | MSQTITNP-----HVAVLAF PFS THAAPLLAVVRR LAAAPHAVFSFFS PSQSNASIFHDSMHTMOCNIKSYDISDGVPEGVVFAGR-----PQEDIELFTRAAPESFRQGMVAVA-ETGRPVSLVADAFIWFADMAAEMGVAWLP | 138
1.....10.....20.....30.....40.....50.....60.....70.....80.....90.....100.....110.....120.....130.....140.....150

```

```

Iris_2
2C1Z_A | PDBID | CHAIN | SEQUENCE | LWTGGPCSFQAHLYTDLRLDRIGVGEKADLDAD-LQFIPLGLASLRVRDLPEDIVTGHLDGAFATMLYRMATELFRSFTIILNSFEGLHPETDADLATKFRKPLPIGPLNLLFPSPAVPEPVSSRC LAWLDKFEFDVVVVSFGTVVDL | 291
3HBF_A | PDBID | CHAIN | SEQUENCE | FWTAGPNSLSTHVYIDEIREKIGVSGIQGREDELNFIIPGMSKVRFRDLQEGIVFGNLNSLFSRMLHRMQVLPKAT-AVFINSFEELDDSLTNDLKS KLTVYLNIGPFNLITPPPVPN---TTCCLQWLKERKPTSSVVVISFGTVITP | 284
.....160.....170.....180.....190.....200.....210.....220.....230.....240.....250.....260.....270.....280.....290.....300

```

```

Iris_2
2C1Z_A | PDBID | CHAIN | SEQUENCE | PPSELAELALGLES GSPFLWIKDPAKAKLPAGFLDRTRDRGLLVPWIPQVAVLNHNAVA AFLSHCGWNSVLESMT CGVPMVCRPFLGDQMLNSKVVSQVWKVGVRLHNGPMSTINVAEAIKTVVAGDEGKNMRDRAAKMREKATGSVR | 441
3HBF_A | PDBID | CHAIN | SEQUENCE | PPAEVVALSEALEASRVPFISLRDKARVHLP EGFLEKTRGYGMVVPWAPQAEVLAHEAVGAFVTHCGWNSLWESVAGGVPLICRPFPGDRLNGRMVEDVLEIGVRIEGGVFTKSGLMSCFDQILSQEKGKLRLENLRALRETDRAVG | 434
.....310.....320.....330.....340.....350.....360.....370.....380.....390.....400.....410.....420.....430.....440.....450

```

```

Iris_2
2C1Z_A | PDBID | CHAIN | SEQUENCE | PDGSSVRNLNLLLEIVFAR-- 460
3HBF_A | PDBID | CHAIN | SEQUENCE | PKGSSSTENFITLVLDLVSKPKDV 456
.....460.....470..

```

```

Litchi
2C1Z_A | PDBID | CHAIN | SEQUENCE | -----MHQPDNASDPHVAVLAFPFSTHAAPLLSIIISRLASAPNTHFSFFSTAESNNSLLSTHKHYFLPNVKAYNVSNVGP 76
3HBF_A | PDBID | CHAIN | SEQUENCE | -----MSQT--TINPHVAVLAFPFSTHAAPLLAVRRLAAAAPHAVFSFFSTSQSNASIFHDSMHTMQCNKISYDISDGV 74
3HBF_A | PDBID | CHAIN | SEQUENCE | MSTFKNEMNGNLLHVAVLAFPFSTHAAPLLSLVKKIAIEAPKVTFFSFFCTTTINDLFRSNE-FLPNIKYYNVHDGLP 79
1.....10.....20.....30.....40.....50.....60.....70.....80

```

```

Litchi
2C1Z_A | PDBID | CHAIN | SEQUENCE | DNVVLLGKPOEDIELFMKAAPENLRKAVAKAAVETRRKVSCLVTDSEFLWFAEAEEMQVFPVPCWLSGSSSLSTHFYTD 156
3HBF_A | PDBID | CHAIN | SEQUENCE | EGYVFAGRPOEDIELFTRAAPESFRQGMVAVAETGRPVSCLVADAFIWFADMAEEMGVAVLPFWTAGPNSLSTHFYTD 154
3HBF_A | PDBID | CHAIN | SEQUENCE | KGVVSSGNPREPIFLFIKAMQENFKHVIDEAVAETGKNIITCLVTDAFFWFGADLAEMHAKVWVPLWTAGPHSLLTHFVYTD 159
.....90.....100.....110.....120.....130.....140.....150.....160

```

```

Litchi
2C1Z_A | PDBID | CHAIN | SEQUENCE | VIREKMGLEGIEGREDEQLKFIQGMKVCIRDLPEGVLFGNLQSIIFSDMLHRMGLOLPGDAVVINSFELDPTINNDLK 236
3HBF_A | PDBID | CHAIN | SEQUENCE | EIREKIGVSGIQGREDELLNFIQGMKVRFRDLQEGIVFGNLNSLFRMLHRMGQVLPKATAVFINSFELDDSLTNDLK 234
3HBF_A | PDBID | CHAIN | SEQUENCE | LIREKIGSKEVHDVKS--LDVLPGFPELKASDLPEGVIK-DIDVPFATMLHKMGLELPRANAVAINSFATIHPLIENELN 236
.....170.....180.....190.....200.....210.....220.....230.....240

```

```

Litchi
2C1Z_A | PDBID | CHAIN | SEQUENCE | SKFKQFLNVGPFNLISPPPAVVDTSCLPWLDRQKPAVAVYLFQGSVSRPPEIVAVAEALASKLPFIWSLKNLQAD 316
3HBF_A | PDBID | CHAIN | SEQUENCE | SKLKTLYLNIQGFNLITPPPVVNTTGCLOWLKERKPTSVVYISFGTVTTPPPAEVVALSEALEASRVPPFIWSLRDKARVH 314
3HBF_A | PDBID | CHAIN | SEQUENCE | SKFKLLNVGPFNLITPQRKVSDEHGCLWLDQHENSSVVYISFGSVVTPPPHELALASLEECGFPPFIWSFRGDPKEK 316
.....250.....260.....270.....280.....290.....300.....310.....320

```

```

Litchi
2C1Z_A | PDBID | CHAIN | SEQUENCE | LPNRKLN----GIMVEWAPQLDVLAHNAVGVFINHGGWSSLMESMACGVPMIIRPFFGDORLARMVQDEWKIGVSV 391
3HBF_A | PDBID | CHAIN | SEQUENCE | LPEGFLEKTRGYGMVVPWAPQAEVLAHEAVGAFVTHCGWNSLWESVAGGVPLICRPFPGDORLNGRMVEDVLEIGVRIEG 394
3HBF_A | PDBID | CHAIN | SEQUENCE | LPKGFLERTKIKGKIVAWAPQVEILKHSVGVFLTHSGWNSVLECIVGGVPMISRPFPGDQLNTILTESVLEIGVGV 396
.....330.....340.....350.....360.....370.....380.....390.....400

```

```

Litchi
2C1Z_A | PDBID | CHAIN | SEQUENCE | GIITKRGFRLSLDLILWQENGGKMRNVRKFKQLAETAVGPGQSSMKNFKALVDIVSRPND 453
3HBF_A | PDBID | CHAIN | SEQUENCE | GVFTKSGLMSCFDQILSQEKGKLRNLRALRETADRAVGPKGSSTENFI TLVDLVSKPKDV 456
3HBF_A | PDBID | CHAIN | SEQUENCE | GVLTKESIKKALELIMSSEKGGIMRQKIVKLKESAFKAVEQNGTSAMDFTTLIQIVTS---- 454
.....410.....420.....430.....440.....450.....460...

```



```

Perilla_3                : *..*****.***.***:*:*:* * * . ***: : : * : * *      ** : : : * *
2C1Z_A | PDBID | CHAIN | SEQUENCE  -----MGFE--LHIGVLAFFPGTHAPELLALVRRRLAASSPTLFSFLNESAESNAALFNERTYD---NIRAFDVWDGTP      68
3HBF_A | PDBID | CHAIN | SEQUENCE  ---MSQITTN--PHVAVLAFPFSTHAAPLLAVRRRLAAAPHAVFSFFSISQSNASIFHDSMTMCCNIKSYDISDGVPT      74
                               MSTFKNEMNGNLLHVAVLAFPGTHAAPLLSLVKKIAIEAPKVTFFSFFCTTTNDLFS-RSNEFLPNIKYYNVHDGLP      79
                               1.....10.....20.....30.....40.....50.....60.....70.....80

```

```

Perilla_3                : * : * * * : * : * * * * * : * : * * * * * : * : * * * * * : * : * * * * *
2C1Z_A | PDBID | CHAIN | SEQUENCE  EGRIFIGTHFEAVGLFKASPENFDKVIIEAEPKIGLKTICCLITDAFLWFACDMAQKRGLPWVPFWTAASCSSSHLYTD      148
3HBF_A | PDBID | CHAIN | SEQUENCE  EGYVFAGRPQEDIELFTRAAPESFRQGMVAVAETGRPVVCLVADAFIWFADMAEMGVAVLPFWTAGPNLSLTHVYID      154
                               KGVVSGNPREPIFLFIKAMQENFKHVIDEAVAETGKNIITCLVTDAFFWFAGADLAEMHAKVWVLPWTAGPHSLLIHVYTD      159
                               .....90.....100.....110.....120.....130.....140.....150.....160

```

```

Perilla_3                * : * : : : * : * * * : * : * * : : * * * * * * * * * * : : * : * : * :
2C1Z_A | PDBID | CHAIN | SEQUENCE  QIVKAG-----TANQEQNLSFIPGLEMATLIDLPEVFLDNSPPLAITINKMVEKLPKSTAVVLNSFEIDPIITDDLK      223
3HBF_A | PDBID | CHAIN | SEQUENCE  EIREKIGVSGIQGREDELLNFIPIGMSKVRFRDLQEGIVFVGNLSLFSRMLHRMGVLPKATAVFINSFEELDDSLTNDLK      234
                               LIREKIGSK--EVHDVKSIDVLPGFPELKAADLPEGVIKD-IDVPPATMLHKMGLELPANAVAINSFATIHPLIENELN      236
                               .....170.....180.....190.....200.....210.....220.....230.....240

```

```

Perilla_3                : * * * * * : * * * * * : * * * * * : * * * * * : * * * * * : * * * * *
2C1Z_A | PDBID | CHAIN | SEQUENCE  TKFKNFLNVGPSILASPPQATPDDEITGCLSWLADQTPKSVVVISFGTIVIPPENELAAALDALEICRFPFLWSLKDYAV      303
3HBF_A | PDBID | CHAIN | SEQUENCE  SKLKTLYNLIGPFNLITPPPVVPN-TIGCLOWLKERK-PTSVVVISFGTIVTPPPAEVVALSEALEASRVFFIWSLRDKAR      312
                               SKFKLLNLVGPFNLTTPQRKVSDEHGCLQWLDLHE-NSSVVVISFGSVVTPPPHELTALAESLEECGFPIWVFRGDPK      314
                               .....250.....260.....270.....280.....290.....300.....310.....320

```

```

Perilla_3                **.*:*:* * : * .*** : : * * * * * .*** : * : * .*** : * : * .*** :
2C1Z_A | PDBID | CHAIN | SEQUENCE  KSLPDGFLDRTKGFGKIVAWAPOQVLAHRNVGVFVTHCGWNSILESISSCVPLICRPFPGDQKLNLRMVQDSWKIGVRV      383
3HBF_A | PDBID | CHAIN | SEQUENCE  VHLPEGFLEKTRGYGMVWPAPQAEVLAHEAVGAFVTHCGWNSLWESVAGGVPLICRPFPGDQRLNLRMVQDSWKIGVRV      392
                               EKLPKGFLEKTRKTKGKIVAWAPOVEILKHSVGVFVTHCGWNSVLECIVGGVPMISRPFFGQGLNLTLESVLEIGVGV      394
                               .....330.....340.....350.....360.....370.....380.....390.....400

```

```

Perilla_3                : * * * * * . * : * * * * * : * * * * * : * * * * * : * * * * *
2C1Z_A | PDBID | CHAIN | SEQUENCE  EGGVFTKNEAVESLKLMAIEAGMKIRENVSLLEKATAAVKPEGSSSQNFKLLLEIIGAES      447
3HBF_A | PDBID | CHAIN | SEQUENCE  EGGVFTKSGMLSCFDQILSQEKGKLRNLRALRETADRAVGPKGSSTENFILLVLDLVSKPKDV      456
                               DNGVLTRESIKKALELIMSSEKGGIMRQKIVKLESAFKAVEQNGTSAMDFTLIIQIVTS----      454
                               .....410.....420.....430.....440.....450.....460.....

```



```

*      *      *      *      *      *      *      *      *      *      *      *      *      *      *      *      *      *      *      *      *      *      *
Petunia_2      -----MSN--YHVAVLAFPFATHAGLLGLVORLANALPNVITFFNFKSNSSSLFTIPHDN--NIKPFNISDGVP      67
2C1Z_A | PDBID | CHAIN | SEQUENCE -----MSQTTN--PHVAVLAFPFSTHAAPLLAVVRRLLAAAAPHAVFSFFSTSQSNASIFHDSMHTMQCNIKSYDISDGVP      74
3HBF_A | PDBID | CHAIN | SEQUENCE MSIFKNEMNGNLLHVAVLAFPFSTHAAPLLSLVKKIATEAPKVTFFSFFCTTTTNDLFRSNEFLP--NIKYYNVHDGLP      79
1.....10.....20.....30.....40.....50.....60.....70.....80

:***  *      *      *      *      *      *      *      *      *      *      *      *      *      *      *      *      *      *      *      *      *      *
Petunia_2      EGYVVGKGGIEALIGLFFKSAKENIQNAMAAAVEESGKKITCVMAADAFMWFSGEIAEELSVGWIPLWISAAGSLSVHVVY      147
2C1Z_A | PDBID | CHAIN | SEQUENCE EGYVFA-GRPQEDIELFTRAAPESFRQGMVAVAETGRFVSCLVADAFIWFADMAAEMGVAWLPFWTAGPNSLSTHYVI      153
3HBF_A | PDBID | CHAIN | SEQUENCE KGYVSS-GNPREPIFLFIKAMQENFKHVIDEAVAETGKNITCLVTDAFFWFADLAEMHAKWVPLWTAGPHSLLTHTVYT      158
.....90.....100.....110.....120.....130.....140.....150.....160

*      *      *      *      *      *      *      *      *      *      *      *      *      *      *      *      *      *      *      *      *      *
Petunia_2      DLIRENVEAQGIAGREDEILTFIPGFABELRLGSLPSGVVSGDLESFVMLHKMGKTIGKATALPVNSFEELDPPIVEDL      227
2C1Z_A | PDBID | CHAIN | SEQUENCE DEIREKIGVSGIQGREDELLNFIPGMSKVRFRDLQEGIVFGNLSLFSRMLHRMGQVLPKATAVFINSEELDDSLTNDL      233
3HBF_A | PDBID | CHAIN | SEQUENCE DLIREKIGSKEVHDVKS--IDVLPGFPELKASDLPEGVIK-DIDVFPATMLHKMGLELPRANAVAINSFATIHPLIENEL      235
.....170.....180.....190.....200.....210.....220.....230.....240

:***:  **:*      *      *      *      *      *      *      *      *      *      *      *      *      *      *      *      *      *      *      *      *
Petunia_2      KSKFNNFLNVGPFNLTTPPPANITDEYGCIAWLDKQEPGSVAYIGFGTVAITPPPNEKAMAEALEESKTPFLWSLKDLF      307
2C1Z_A | PDBID | CHAIN | SEQUENCE KSKLKTVLNIGPFNLTTPPP--VVNNTGLOWLKERKPTSVVYISFGTVTTPPPAEVVALSEALEASRVFFIWSLRDKA      311
3HBF_A | PDBID | CHAIN | SEQUENCE NSKFKLLLVGPFNLTTPQR--KVSDEHGCLEWLDCHENSSVVYISFGSVVITPPPHELTALAESLEECGFFIWSFRGDP      313
.....250.....260.....270.....280.....290.....300.....310.....320

:      *      *      *      *      *      *      *      *      *      *      *      *      *      *      *      *      *      *      *      *      *
Petunia_2      KSFPEGFLEKRTSEYGVKIVSWAPQVQVLSHGSVGVFINHCGWNSVLESIAAGVPVICRPFPGDHLNAWMVEKVVKIGVK      387
2C1Z_A | PDBID | CHAIN | SEQUENCE RVHLPEGFLEKTRGYGMVVPWAPQAEVLAHEAVGAFVTHCGWNSLWESVAGGVPLICRPFPGDRLNNGRMVEDVLEIGVR      391
3HBF_A | PDBID | CHAIN | SEQUENCE KEKLPKGFLEKRTKTKKIVAWAPQVEILKHSVGVFLTHSGWNSVLEICIVGGVPMISRPFPGDQGLNTILTESVLEIGVG      393
.....330.....340.....350.....360.....370.....380.....390.....400

:.*:*      *      *      *      *      *      *      *      *      *      *      *      *      *      *      *      *      *      *      *      *
Petunia_2      IEGGVFTKDGTMALDLVLVSKDKRNTLKKQIGMYKELALNAVGPSGSSAENFKKLVDIITSCN--      451
2C1Z_A | PDBID | CHAIN | SEQUENCE IEGGVFTKSGLMSCFDQILSQEK-GKKLRNLRALREIADRAVGPKGSSTENFITLVDLVSFKPKDV      456
3HBF_A | PDBID | CHAIN | SEQUENCE VDNQVLTKEISKKALELIMSSEK-GGIMRQKIVKLKESAFKAVEQNGTSAMDFTTLIQIVTS---      454
.....410.....420.....430.....440.....450.....460.....

```

```

Populus2          .          ****:*:*:*:*:*:*:*:*:*:*:*:*:*:*:*:*:*:*:*:*:*:*:*:*:*:*:*:*:*:*:*:*:*:*
2ClZ_A | PDBID | CHAIN | SEQUENCE  -----MSD---HVAVFAPFPGTHAAPLLAIHRLAATASPNTHFSFFSTQOSNSIFSIYKKMNMOPNIKAYEVVD 69
3HBF_A | PDBID | CHAIN | SEQUENCE  --MSQTTNP---HVAVLAFPFSTHAAPLLAVRRRLAAAAPHAVFSFFSTSQSNASIF---HDSMHTMQCNIKSYDISD 71
MSIFKNEMNGNLLHVAVLAFPFPGTHAAPLLSLVKKIAEAPKVTFFFFCTTTNDLFS---RSNEFLPNIKYVNVHD 76
1.....10.....20.....30.....40.....50.....60.....70.....80

```

```

Populus2          * * * * * * * * * * * * * * * * * * * * * * * * * * * * * * * * * * * * * * * * * * * * * * * * * * * * *
2ClZ_A | PDBID | CHAIN | SEQUENCE  GAPEGYVFSGNPOEHIELFMKSARESLKKAMEVAVSETGRKVSCLVSDAFFWFACEMAEIIGVGWLPFWTAGPNSLSAHV 149
3HBF_A | PDBID | CHAIN | SEQUENCE  GVPEGYVFAGRPOEDIELFTRAAPESFRQGMVMAVAETGRPVSCLVADAFIWFADMAAEMGVAWLPFWTAGPNSLSTHV 151
GLPKGYVSSGNPREPIFLFIKAMQENFKHVIDEAVAETGKNITCLVDAFFWFGADLAEEMHAKWVPLWTAGPHSLTHV 156
.....90.....100.....110.....120.....130.....140.....150.....160

```

```

Populus2          * * * * * * * * * * * * * * * * * * * * * * * * * * * * * * * * * * * * * * * * * * * * * * * * * * * * *
2ClZ_A | PDBID | CHAIN | SEQUENCE  YIDLIRETFDGGMVGREDKTISLIQGMKIRICDLPEGVLFGNTESFFSNMLHKMGKALPQAAAVFINSFEELDPGIIK 229
3HBF_A | PDBID | CHAIN | SEQUENCE  YIDEIREKIGVSGIQGREDELLNFIPGMSKVRFRDLQEGIVFNLNLSRMLHRMGQVLPKATAVFINSEELDDSLTN 231
YIDLIREKTGSKEVH--DVKSIDVLPGFPELKASDLPEGVIK-DIDVVFATMLHKMGLELPRANAVAINSFATIHPLIEN 233
.....170.....180.....190.....200.....210.....220.....230.....240

```

```

Populus2          :*:*:* * * * * * * * * * * * * * * * * * * * * * * * * * * * * * * * * * * * * * * * * * * * * * * * * * * * *
2ClZ_A | PDBID | CHAIN | SEQUENCE  DLKSRFKKFLNIGPSHLILSPPMEDIYGCMTWLDKQKLASVAVVSVFGSVITPPPHELVALAELETSETPFIWSLKDNS 309
3HBF_A | PDBID | CHAIN | SEQUENCE  DLKSKLRTYLNIGPFNLITPPPVVNNTTGLOWLKERKPTSVVYISFGTVTTPPPAEVVALSEALEASRVFFIWSLRDKA 311
ELNSKFKLLLVGPFNLITPQRKVSDEHGCLEWLDCHENSSVYVYISFGSVVITPPPHELTALAESLEECGFPIWSFRGDP 313
.....250.....260.....270.....280.....290.....300.....310.....320

```

```

Populus2          : * * * * * * * * * * * * * * * * * * * * * * * * * * * * * * * * * * * * * * * * * * * * * * * * * * * * *
2ClZ_A | PDBID | CHAIN | SEQUENCE  KVHLPHGFDRITISQGLVVPWSPQLEVLARAVGVFVTHCGWNSLLESIAAGVPMICRPFPGDQRLNGRMIEDVVEIGLK 389
3HBF_A | PDBID | CHAIN | SEQUENCE  RVHLPEGFLEKTRGYGMVVPWAPQAEVLAHEAVGAFVTHCGWNSLWESVAGGVPLICRPFPGDQRLNGRMVEDVLEIGVR 391
KEKLPKGFLEKTKTKGKIVAWAPQVEILKHSVGVFLTHSGWNSVLECVIGGVPMISRPFPGDQGLNTILTESVLEIGVG 393
.....330.....340.....350.....360.....370.....380.....390.....400

```

```

Populus2          : : * * * * * * * * * * * * * * * * * * * * * * * * * * * * * * * * * * * * * * * * * * * * * * * * * * * * *
2ClZ_A | PDBID | CHAIN | SEQUENCE  VEDGVFTKLEVLNLSLNKILSHEGGQKMRNIRALKQLAKKAIGPNSSINNFIALSNLVFNTKI- 453
3HBF_A | PDBID | CHAIN | SEQUENCE  IEGGVFTKSGLMSCFDQILSQEKGKLRNLRALRETADRAVGPKGSSTENFITLVDLVSKPKDV 456
VDNGVLTKESIKKALELIMSSEKGGIMRQKIVKLKESAFKAVEQNGTSAMDFTLIQIVTS--- 454
.....410.....420.....430.....440.....450.....460.....

```

Populus3  
 2ClZ\_A | PDBID | CHAIN | SEQUENCE MS<sup>E</sup>AR-----NDLKHIAVLAF<sup>P</sup>VATHGPP<sup>L</sup>LSLVRR<sup>L</sup>LSASAS<sup>Y</sup>AKF<sup>S</sup>FF<sup>S</sup>T<sup>K</sup>ES<sup>N</sup>SKL<sup>F</sup>SK-EDGLE-NIK<sup>P</sup>Y<sup>N</sup>VS<sup>D</sup>GL<sup>P</sup> 73  
 3HBF\_A | PDBID | CHAIN | SEQUENCE MS<sup>Q</sup>TT-----TNPHVAVLAF<sup>P</sup>FS<sup>T</sup>HAAP<sup>L</sup>LLAVRR<sup>L</sup>LA<sup>A</sup>AAPHAV<sup>F</sup>SFF<sup>S</sup>T<sup>S</sup>Q<sup>S</sup>NA<sup>S</sup>IF<sup>H</sup>DS<sup>M</sup>H<sup>T</sup>M<sup>O</sup>CC<sup>N</sup>IK<sup>S</sup>Y<sup>D</sup>IS<sup>D</sup>GV<sup>P</sup> 74  
 1.....10.....20.....30.....40.....50.....60.....70.....80 79

Populus3  
 2ClZ\_A | PDBID | CHAIN | SEQUENCE EN<sup>N</sup>NFAG<sup>N</sup>LDE<sup>V</sup>MN<sup>Y</sup>FF<sup>K</sup>AT<sup>P</sup>GN<sup>F</sup>K<sup>O</sup>AME<sup>V</sup>AV<sup>K</sup>EV<sup>G</sup>KD<sup>F</sup>TC<sup>I</sup>MS<sup>D</sup>AF<sup>L</sup>W<sup>F</sup>AA<sup>D</sup>FA<sup>O</sup>EL<sup>H</sup>V<sup>P</sup>W<sup>V</sup>PL<sup>W</sup>T<sup>S</sup>SR<sup>S</sup>RL<sup>L</sup>LV<sup>L</sup>E<sup>I</sup>D 153  
 3HBF\_A | PDBID | CHAIN | SEQUENCE E<sup>G</sup>V<sup>F</sup>FAG<sup>R</sup>P<sup>O</sup>ED<sup>I</sup>EL<sup>F</sup>T<sup>R</sup>AA<sup>P</sup>ES<sup>F</sup>R<sup>Q</sup>GM<sup>V</sup>MA<sup>V</sup>AE<sup>T</sup>GR<sup>P</sup>V<sup>S</sup>CL<sup>V</sup>AD<sup>A</sup>FI<sup>W</sup>F<sup>A</sup>AD<sup>M</sup>AE<sup>M</sup>GV<sup>A</sup>W<sup>L</sup>P<sup>F</sup>WT<sup>A</sup>GP<sup>N</sup>SL<sup>S</sup>TH<sup>V</sup>Y<sup>I</sup>D 154  
 .....90.....100.....110.....120.....130.....140.....150.....160 159

Populus3  
 2ClZ\_A | PDBID | CHAIN | SEQUENCE LV<sup>H</sup>OK<sup>M</sup>R-SI<sup>I</sup>NE<sup>P</sup>ED<sup>R</sup>T<sup>I</sup>D<sup>I</sup>L<sup>P</sup>GF<sup>S</sup>EL<sup>R</sup>GS<sup>D</sup>IP<sup>K</sup>EL<sup>F</sup>HD<sup>V</sup>KE<sup>S</sup>Q<sup>F</sup>AAM<sup>L</sup>CK<sup>I</sup>GL<sup>A</sup>L<sup>P</sup>QA<sup>A</sup>V<sup>V</sup>AS<sup>N</sup>SF<sup>E</sup>EL<sup>D</sup>DP<sup>A</sup>V<sup>I</sup>L<sup>F</sup>K 232  
 3HBF\_A | PDBID | CHAIN | SEQUENCE EI<sup>R</sup>E<sup>K</sup>I<sup>G</sup>V<sup>S</sup>GI<sup>Q</sup>GR<sup>E</sup>DEL<sup>L</sup>N<sup>F</sup>PG<sup>M</sup>SK<sup>V</sup>R<sup>F</sup>RD<sup>L</sup>Q<sup>E</sup>GI<sup>V</sup>FG<sup>N</sup>L<sup>N</sup>SL<sup>F</sup>SR<sup>M</sup>L<sup>H</sup>RM<sup>G</sup>Q<sup>V</sup>L<sup>P</sup>KA<sup>T</sup>AV<sup>F</sup>IN<sup>S</sup>F<sup>E</sup>EL<sup>D</sup>DS<sup>L</sup>T<sup>N</sup>DL<sup>K</sup> 234  
 .....170.....180.....190.....200.....210.....220.....230.....240 236

Populus3  
 2ClZ\_A | PDBID | CHAIN | SEQUENCE S<sup>R</sup>L<sup>P</sup>K<sup>F</sup>L<sup>N</sup>I<sup>G</sup>P<sup>F</sup>V<sup>L</sup>T<sup>S</sup>P<sup>D</sup>PF<sup>M</sup>S<sup>D</sup>PH<sup>G</sup>C<sup>L</sup>E<sup>W</sup>L<sup>D</sup>K<sup>O</sup>Q<sup>E</sup>S<sup>V</sup>V<sup>Y</sup>I<sup>S</sup>FG<sup>S</sup>V<sup>I</sup>T<sup>L</sup>PP<sup>Q</sup>E<sup>L</sup>A<sup>E</sup>L<sup>V</sup>E<sup>A</sup>L<sup>K</sup>E<sup>C</sup>K<sup>L</sup>P<sup>F</sup>L<sup>W</sup>S<sup>F</sup>R<sup>G</sup>N<sup>P</sup>K<sup>E</sup>E 312  
 3HBF\_A | PDBID | CHAIN | SEQUENCE S<sup>K</sup>L<sup>K</sup>T<sup>Y</sup>L<sup>N</sup>I<sup>G</sup>P<sup>F</sup>N<sup>L</sup>I<sup>T</sup>PP<sup>P</sup>V<sup>V</sup>P<sup>N</sup>T<sup>T</sup>G<sup>C</sup>L<sup>W</sup>L<sup>K</sup>E<sup>R</sup>K<sup>P</sup>T<sup>S</sup>V<sup>V</sup>Y<sup>I</sup>S<sup>F</sup>G<sup>T</sup>V<sup>T</sup>TP<sup>P</sup>PA<sup>E</sup>V<sup>V</sup>AL<sup>S</sup>E<sup>A</sup>E<sup>A</sup>S<sup>R</sup>V<sup>P</sup>FI<sup>W</sup>S<sup>L</sup>R<sup>D</sup>K<sup>A</sup>R<sup>V</sup>H 314  
 .....250.....260.....270.....280.....290.....300.....310.....320 316

Populus3  
 2ClZ\_A | PDBID | CHAIN | SEQUENCE L<sup>P</sup>E<sup>F</sup>L<sup>E</sup>R<sup>T</sup>K<sup>E</sup>K<sup>G</sup>K<sup>V</sup>V<sup>S</sup>W<sup>T</sup>P<sup>L</sup>K<sup>V</sup>L<sup>R</sup>H<sup>K</sup>A<sup>I</sup>G<sup>V</sup>F<sup>V</sup>T<sup>H</sup>S<sup>G</sup>W<sup>N</sup>S<sup>V</sup>L<sup>D</sup>S<sup>I</sup>A<sup>G</sup>C<sup>V</sup>P<sup>M</sup>I<sup>C</sup>R<sup>P</sup>F<sup>F</sup>G<sup>D</sup>Q<sup>I</sup>V<sup>N</sup>T<sup>R</sup>I<sup>E</sup>A<sup>V</sup>W<sup>G</sup>T<sup>G</sup>L<sup>E</sup>I<sup>E</sup>G 392  
 3HBF\_A | PDBID | CHAIN | SEQUENCE L<sup>P</sup>E<sup>G</sup>F<sup>L</sup>E<sup>K</sup>T<sup>R</sup>G<sup>Y</sup>G<sup>M</sup>V<sup>V</sup>P<sup>W</sup>AP<sup>Q</sup>A<sup>E</sup>V<sup>L</sup>A<sup>E</sup>A<sup>V</sup>G<sup>A</sup>F<sup>V</sup>T<sup>H</sup>C<sup>G</sup>W<sup>N</sup>S<sup>L</sup>W<sup>E</sup>S<sup>V</sup>A<sup>G</sup>G<sup>V</sup>P<sup>L</sup>I<sup>C</sup>R<sup>P</sup>F<sup>F</sup>G<sup>D</sup>Q<sup>R</sup>L<sup>N</sup>G<sup>R</sup>M<sup>V</sup>E<sup>D</sup>V<sup>L</sup>E<sup>I</sup>G<sup>V</sup>R<sup>I</sup>E<sup>G</sup> 394  
 .....330.....340.....350.....360.....370.....380.....390.....400 396

Populus3  
 2ClZ\_A | PDBID | CHAIN | SEQUENCE G<sup>R</sup>I<sup>T</sup>K<sup>G</sup>G<sup>L</sup>M<sup>K</sup>A<sup>L</sup>R<sup>L</sup>I<sup>M</sup>S<sup>T</sup>D<sup>E</sup>G<sup>N</sup>K<sup>M</sup>R<sup>K</sup>K<sup>L</sup>Q<sup>H</sup>L<sup>O</sup>L<sup>G</sup>L<sup>A</sup>D<sup>A</sup>V<sup>O</sup>S<sup>S</sup>G<sup>S</sup>S<sup>T</sup>K<sup>N</sup>F<sup>E</sup>T<sup>L</sup>L<sup>E</sup>V<sup>V</sup>A<sup>K</sup>--- 450  
 3HBF\_A | PDBID | CHAIN | SEQUENCE G<sup>V</sup>F<sup>T</sup>K<sup>S</sup>G<sup>L</sup>M<sup>S</sup>C<sup>F</sup>D<sup>Q</sup>I<sup>L</sup>S<sup>Q</sup>E<sup>R</sup>G<sup>K</sup>K<sup>L</sup>R<sup>E</sup>N<sup>L</sup>R<sup>A</sup>L<sup>R</sup>E<sup>T</sup>A<sup>D</sup>R<sup>A</sup>V<sup>G</sup>P<sup>K</sup>G<sup>S</sup>S<sup>T</sup>E<sup>N</sup>F<sup>I</sup>T<sup>L</sup>V<sup>D</sup>L<sup>V</sup>S<sup>K</sup>P<sup>K</sup>D<sup>V</sup> 456  
 .....410.....420.....430.....440.....450.....460... 454

```

Populus_1      * . . . . . ***** . . . . . : * : * * * . . . . . * * * * * : * * * *
2ClZ_A | PDBID | CHAIN | SEQUENCE MP-----QTAAQPDHVAVLAFPFSSHAAPLLAIHRLAISPNTHF SFFSTQOSNNSIF--SIYKQNRN IKAYDVWDGVP 73
3HBF_A | PDBID | CHAIN | SEQUENCE MS-----QTTTNP-HVAVLAFPFSTHAAPLLAVVRRLLAAAAPHAVFSFFSTSQSNASIFHDSMHTMQCN IKSYDISDGV 74
1.....10.....20.....30.....40.....50.....60.....70.....80
Populus_1      : * * * * * : * * * * * : * * * * * : * * * * * : * * * * * : * * * * * : * * * * * : * * * * *
2ClZ_A | PDBID | CHAIN | SEQUENCE EGYVFAGKPOEHIELFMKSA PNFKAMEVAVSE TGRKVSCLVSDAFFWFAGEMAEIIGVVWLPFWTAGPTSLSAHVYTD 153
3HBF_A | PDBID | CHAIN | SEQUENCE EGYVFAGRPQEDIELFTRAAPE SFRQGMVAVAETGRPV SCLVADAFIWFADMAEMGVAWLPFWTAGPNSLSTHVYTD 154
.....90.....100.....110.....120.....130.....140.....150.....160
Populus_1      * : . . . . . : . . . . . : . . . . . : . . . . . : . . . . . : . . . . . : . . . . . : . . . . .
2ClZ_A | PDBID | CHAIN | SEQUENCE LIRDTFVGGVAGHEDELLSLIPGMSKIRIRDLPEGVLFGNLEAVFPNMLHMKGRALPKAAAVFINSFEELDPRI TRDLK 233
3HBF_A | PDBID | CHAIN | SEQUENCE EIREKIVSGIQGREDELLNFI PGMSKVRFRDLQEGIVFGNLSLFSRMLHRMGQVLPKATAVFINSFEELDDSLTNDLK 234
.....170.....180.....190.....200.....210.....220.....230.....240
Populus_1      * : * * * * * : * * * * * : * * * * * : * * * * * : * * * * * : * * * * * : * * * * * : * * * * *
2ClZ_A | PDBID | CHAIN | SEQUENCE SRFKEFLNIGPFNMISPAPPAADTYGCITWLDROKLSVAYLSFGSITPPPHHELVALAEALETS GVPFIWSLKDNSKVH 313
3HBF_A | PDBID | CHAIN | SEQUENCE SKLKTLYLNIGPFNLITPPPVVNTTGCLOWLKERKPTSVVYISFGTITPPPAEVVALSEALEASRVPF IWSLRDKARVH 314
.....250.....260.....270.....280.....290.....300.....310.....320
Populus_1      * : * * * * * : * * * * * : * * * * * : * * * * * : * * * * * : * * * * * : * * * * * : * * * * *
2ClZ_A | PDBID | CHAIN | SEQUENCE LPNGFLDRITIQGLLVPWTPQMEVLAHKAVGVFI THCGWNSLLESIAAGVPMICRPFPGDORLNGRMVEDAWKIGLQVED 393
3HBF_A | PDBID | CHAIN | SEQUENCE LPEGFLEKTRGYGMVVPWAPQAEVLAHEAVGAFVTHCGWNSLWESVAGGVPLICRPFPGDORLNGRMVEDVLEIGVRIEG 394
.....330.....340.....350.....360.....370.....380.....390.....400
Populus_1      * : * . . . . . : * : * * * * * : * : * * * * * : * : * * * * * : * : * * * * * : * : * * * * *
2ClZ_A | PDBID | CHAIN | SEQUENCE GVFRKHGVLNSLDKVLSDSGEEMRENIRALQQLAKKAIGPN GSSINNFVSLDLV----- 449
3HBF_A | PDBID | CHAIN | SEQUENCE GVFTKSGLMSCFDQILSQEKGKLRNLRALRETADRAVGPKGSSTENFI TLVDLVSKPKDV 456
.....410.....420.....430.....440.....450.....460

```



```

Rosa_1
2C1Z_A | PDBID | CHAIN | SEQUENCE  MAPASNGVGG---HVAVLAFPFSTHAAPLLNIVCRLAAAAANTLFSFFNFKOSNSILASNTISILRNSNVRVCEVADG 76
3HBF_A | PDBID | CHAIN | SEQUENCE  MSQTITNF-----HVAVLAFPFSTHAAPLLAVRRLAAAAAPHAVFSFFSISQSNASIFHDSMHTMQCN--IKSYDISDG 72
3HBF_A | PDBID | CHAIN | SEQUENCE  MSTFKNEMNGNLLHVAVLAFPGFTHAAPLLSLVKKIAIEAPKVTFSFFCTTTINDLFSR--SNEFLPN--IKYYNVHDG 77
1.....10.....20.....30.....40.....50.....60.....70.....80

```

```

Rosa_1
2C1Z_A | PDBID | CHAIN | SEQUENCE  VPEGYVFGKPOEDIELFMKAAPDNFRRCLEASVAETGREVSCLVTDAFFWFGAHMADDLGGLPWVPFWTAGPASLSAHV 156
3HBF_A | PDBID | CHAIN | SEQUENCE  VPEGYVFGAGRPOEDIELFTRAAPESFRQGMVMAVAETGRPVSCLVADAFIWFADMAAEMG-VAWLPFWTAGPNSLSTHV 151
3HBF_A | PDBID | CHAIN | SEQUENCE  LPKGYSVSSGNPREPIFLFIKAMQENFKHVIDEAVAETGKNITCLVTDAFFWFGADLAEEMH-AKWVPLWTAGPHSLTHV 156
.....90.....100.....110.....120.....130.....140.....150.....160

```

```

Rosa_1
2C1Z_A | PDBID | CHAIN | SEQUENCE  HTDLIRNTISMGGHDGKE-TTAVTAGMSKVRPQDLPEGIIFGKLDLFSRMLHQMGLMLPLATAVFINSFEELDPVITN 235
3HBF_A | PDBID | CHAIN | SEQUENCE  YIDEIREKIGVSGIQGREDELLNFIPGMSKVRFRDLQEGIVFGLNLSLFSRMLHRMQVLPKATAVFINSFEELDLSTN 231
3HBF_A | PDBID | CHAIN | SEQUENCE  YNDLIREKIGSK--EVHVDKSIDVLPGFPELKASDLPEGVIK-DIDVVFATMLHKMGLELPRANAVAINSFATIHPLIEN 233
.....170.....180.....190.....200.....210.....220.....230.....240

```

```

Rosa_1
2C1Z_A | PDBID | CHAIN | SEQUENCE  DLKSKFKRYLNVGPFLLLESAPAAATITLQTDVVVGDGCLSWLDKQKAAVVVYVSGSVTRPSPPEELMALAEALEASRV 315
3HBF_A | PDBID | CHAIN | SEQUENCE  DLKSKLTYLNI GPFNLITPPPVVNTT-----GCLQWLKERKPTSVVYISFGTVTTPPPAEVVALSEALEASRV 301
3HBF_A | PDBID | CHAIN | SEQUENCE  ELNSKFKLLLVGPFNLITPQRKVSDEH-----GCLEWLDQHENS SVVYISFGSVVTPPPHELTA LAESLEECGF 303
.....250.....260.....270.....280.....290.....300.....310.....320

```

```

Rosa_1
2C1Z_A | PDBID | CHAIN | SEQUENCE  PFLWSLRNNLMTPKLDEFISKAE LN GMVVPWVPOPQVLAHGSVGFVTHCGWNSVLES LAGGVPMICRPFPGDOKLNARM 395
3HBF_A | PDBID | CHAIN | SEQUENCE  PFIWSLRDKARVHLPEGFLEKTRGYGMVVPWAPQAEVLAHEAVGAFVTHCGWNSLWESVAGGVPLICRPFPGDORLNGRM 381
3HBF_A | PDBID | CHAIN | SEQUENCE  PFIWSFRGDPKKEKLPKGFLEKTKTKGKIVAWAPQVEILKHSVGVFLTHSGWNSVLECVIGGVPMISRPFPGDQGLNTIL 383
.....330.....340.....350.....360.....370.....380.....390.....400

```

```

Rosa_1
2C1Z_A | PDBID | CHAIN | SEQUENCE  VEDEWKIGLKEGGVFTKNGMLKSLDILLSQKKNIMRDTINTFKQLAQQAVEPKGSSTRNFESLLEVISTAN-- 468
3HBF_A | PDBID | CHAIN | SEQUENCE  VEDVLEIGVRIEGGVFTKSLMSCFDQILSQEKGKLRNLRALRETADRAVGPKGSSTENFITLVDLVSKPKDV 456
3HBF_A | PDBID | CHAIN | SEQUENCE  TESVLEIGVGVNDGVLTKESIKKALELTMSEKGGIMRQKIVKLKESAFKAVEQNGTSAMDFTTLIQIVTS---- 454
.....410.....420.....430.....440.....450.....460.....470.....

```

Rosa\_2  
2C1Z\_A | PDBID | CHAIN | SEQUENCE MAGOGPKQPSTQYHHHVAALAFPFQTHAGPLLRLVLR LAAAAPDTIFSFITTSKANSLLFSPTS KASAFI-NVKTYDVPD 79  
3HBF\_A | PDBID | CHAIN | SEQUENCE -MSQTTTNP-----HVAVLAFPFSTHAAPLLAVRR LAAAAPHAVFSFFSTS QSNASIFHD--SMHTMQCNIKSYDISD 71  
1.....10.....20.....30.....40.....50.....60.....70.....80 76

Rosa\_2  
2C1Z\_A | PDBID | CHAIN | SEQUENCE GLPEGLVPSGHPEQAIGFFLKAAPANFRS AMKAEADSGLKIGCLVTDAFFWFAGDIAEEMKLPWVPLW TAGPRLLVHA 159  
3HBF\_A | PDBID | CHAIN | SEQUENCE GVPEGYVFAGRPQEDIELFTRAAPESFRQGMVMAVAETGRPVSLVADAFIWFADMAAEMGVAWLPFWTAGPNSLS THV 151  
.....90.....100.....110.....120.....130.....140.....150.....160 156

Rosa\_2  
2C1Z\_A | PDBID | CHAIN | SEQUENCE ATDLIRORVLG-----TDEKILEFLPGFSKLEVA DLPGEVVS GNLESPISSLLHKMGQQLPKAAAVAIN SLEEAEPDVVN 234  
3HBF\_A | PDBID | CHAIN | SEQUENCE YIDELREKIGVSGI QGREDELLNFI PGMSKVRFRDLQEGIVF GNLSLFSRMLHRMGVLPKATAVFINS FEELDDSLTN 231  
.....170.....180.....190.....200.....210.....220.....230.....240 233

Rosa\_2  
2C1Z\_A | PDBID | CHAIN | SEQUENCE ELKSRFRKFLNVGPFNLTPSPPLLKDDSGCLEWLDKHKP ASVVYISFGSVVRPPPH ELAFAEALIESAFFFIW SFRGN 314  
3HBF\_A | PDBID | CHAIN | SEQUENCE DLKSKLTYLNI GPFNLITPPP-VVPNTT GCLQWLKERKPTSVVYISFGVTI TPPP AEVVALS EALERVPF IWSLRDK 310  
.....250.....260.....270.....280.....290.....300.....310.....320 312

Rosa\_2  
2C1Z\_A | PDBID | CHAIN | SEQUENCE PDDILPKG-CDKSSLNKGLVSWAPQVQILEHAAVGV FVTHCGWNSL ESIVGGVPMIGRPFFGDQILNMRIVETVWG IGV 393  
3HBF\_A | PDBID | CHAIN | SEQUENCE ARVHLPPEGFLEKTRGYGMVVPWAPQAEVLAHEAVG AFVTHCGWNSLWESVAGGVPLICRPFPGDQRLNGRMVEDVLEIGV 390  
.....330.....340.....350.....360.....370.....380.....390.....400 392

Rosa\_2  
2C1Z\_A | PDBID | CHAIN | SEQUENCE GIEGGVLTKHGAIKALELILRGKAGNEMREKIKVLKNL AQS AVEG DGSSSKAFNCLVDIATNHEEV 459  
3HBF\_A | PDBID | CHAIN | SEQUENCE RIEGGVFTKSLMSCFDQILS QEKGKLRLENLRALRE TADRAVGPKGSSTENFITLVDLVS KPKDV 456  
.....410.....420.....430.....440.....450.....460..... 454

Rosa\_3  
2C1Z\_A | PDBID | CHAIN | SEQUENCE MS--HKLASSNPQAPVAVFNFPAFASHPSLLRFIRTIISAVAPDIKFTFFSTSRINSLSLFGSNNKGLDNVKPYNVWDGLP 78  
3HBF\_A | PDBID | CHAIN | SEQUENCE MS----QTTTNP--HVAVLAFPFSTHAAPLLAVRRRLAAAAAPHAVFSFFSTSQSNASIFHDSMHTMQCNIKSYDISDQVP 74  
1.....10.....20.....30.....40.....50.....60.....70.....80 79

Rosa\_3  
2C1Z\_A | PDBID | CHAIN | SEQUENCE EGVVPPSGPPLEQIGLFLDQAPQSFERALKVEVAETGHKFGCLISDAFLWFGDIAQKMNVPWVTIWS-GPRPLLVHLEI 157  
3HBF\_A | PDBID | CHAIN | SEQUENCE EGVVF-AGRPOEDIELFTRAAPESFRQGMVMAVAETGRPVSCLVADAFIWFADMAAEMGVAWLPFWTAGPNSLSTHYVI 153  
.....90.....100.....110.....120.....130.....140.....150.....160 158

Rosa\_3  
2C1Z\_A | PDBID | CHAIN | SEQUENCE DMIREKVGAPGQED--KTLDFLPGFSNEFLASDLPEVVFGNIESPLANMLYKMGKLPQATAVAVNSFETMDLKVSEE 234  
3HBF\_A | PDBID | CHAIN | SEQUENCE DEIREKIGVSGICGREDELNFIPIGMS-KVRFRLDQEGIVFGNLSLFSRMLHRMGQVLPKATAVFINSEELDDSLTND 232  
.....170.....180.....190.....200.....210.....220.....230.....240 234

Rosa\_3  
2C1Z\_A | PDBID | CHAIN | SEQUENCE LKKRLKLLLVGPLHLVVPVPSAQDDDEEEKDACLPLWLDNHKPAVAYISFGSVGALPPMEVAALAEALEGGFPFLWS 314  
3HBF\_A | PDBID | CHAIN | SEQUENCE LKSKLKYLNIGPFNLITPPPVPV-----NTTGLOWLKERKPTSVVYISFGTVTTPPPAEVVALSEALEASRVFFIWS 306  
.....250.....260.....270.....280.....290.....300.....310.....320 308

Rosa\_3  
2C1Z\_A | PDBID | CHAIN | SEQUENCE FRGN-LEDPKGFIERST-GRVVPWVNQVQILNHPISIGVFVTHGGWKS SVLESVTCGVPMIGRPHFADQTLNMRMSVEVW 392  
3HBF\_A | PDBID | CHAIN | SEQUENCE LRDKARVHLPFGFLEKTRGYGMVVPWAPQAEVLAHEAVGAFVTHCGWNSLWESVAGGVPLICRPFPGDQRLNGRMVEDVL 386  
FRGDPKEKLPKGFLEKTKTKGKIVAWAPQVEILKHSVGVFLTHSGWNSVLE CIVGGVPMISRPFPGDQGLNTILTIVSVL 388  
.....330.....340.....350.....360.....370.....380.....390.....400

Rosa\_3  
2C1Z\_A | PDBID | CHAIN | SEQUENCE KIGMRIEGGVFTKSGAIKVLQALSLEGKEMRORVGVLKQLAQETVGNPSSAQDLKW----- 452  
3HBF\_A | PDBID | CHAIN | SEQUENCE EIGVRIEGGVFTKSGLMSCFDQILSQEKGKLRNLRALRETADRAGVPGKSSSTENFITLVDLVSKPKDV 456  
EIGVGVNDNGVLTKESEKKAELTMSSEKGGIMRQKIVKLESAFKAVEQNGTSAMDFTTLCIVTIS---- 454  
.....410.....420.....430.....440.....450.....460.....470



```

      ..  *:*:*****..*::*::: *  :.  **** * : * : : * : .  **** * : : * :
Solanum tuberosum -----MTTSQLHIALLAF PFGSHAAPLLTLVQEI TPFLPNTIF SFFNFSNSNTSIFSKTPN--QENIKIYNIWDGV      70
2C1Z_A | PDBID | CHAIN | SEQUENCE -----MSQTTINPHVAVLAF PFS THAAPLLAVRRLAAAAP-HAVFSFFS TSQSNASIFHDSMHTMOCNIKSYDISDGV      73
3HBF_A | PDBID | CHAIN | SEQUENCE MSTFKNEMNGNLLHVAFLAF PFGTHAAPLLSLVKKIA TEAP-KVTFSFFCTTTND TLF SRSNE-FLPNIKYYNVHDGL      78
1.....10.....20.....30.....40.....50.....60.....70.....80

      *  .  * .  * * * * : :  . : : *  * * *  . : * : * : * : * * : * *  * : : * : * : * * *  * * * *
Solanum tuberosum KQGNDLPIGR--EAIELFI STPTNFEKSMKEAEEETGVKFS CIISDAFLWFSS EFANKMNI PWIAFWTAGSCSLSIHLY      148
2C1Z_A | PDBID | CHAIN | SEQUENCE PEG-YVFAGRPOEDI ELFTRAAPE SFRQGMVAVAETGRPVSC LVADAFIWFADMAAEMGVAWLPFWTAGPNSLSTHVY      152
3HBF_A | PDBID | CHAIN | SEQUENCE PKG-YVSSGNPREPI FLFIKAMQEN FKHVIDEAVAETGKNIT CLVTDAFFWFGADLAEEMHAKVWLWTAGPHSLLTHVY      157
.....90.....100.....110.....120.....130.....140.....150.....160

      * * * .  : : : * * : : * : : : : . * : * . * : * * * * : * : :
Solanum tuberosum TDLIRS-----NDETL LKIPGFSS TLKMS DMPEVIAESLNGPMP SMLYNMALNLH KANAVVLNSFEELDPIINK      218
2C1Z_A | PDBID | CHAIN | SEQUENCE IDEIREKIGVSGI OGREDELNFI PGMS-KVRF RD LQEGIVFG NLN SLFSRMLHRMGQVLP KATAVFINSFEELDDSLTN      231
3HBF_A | PDBID | CHAIN | SEQUENCE TDLIREKIGSK--EVHDVK SIDVLP GFF-ELKASDLP EGVIKD-IDVFFATMLHKMGL ELP RANAVAINS FATIHLIEN      233
.....170.....180.....190.....200.....210.....220.....230.....240

      : * : * : * : * : * : * : * : * : * : * : * : * : * : * : * : * : * : * : * : * : * : * : * : * : * : * : * :
Solanum tuberosum DLKSKLQKVLNIGPLVIL SNNVFLDANS DESGCIHWLDNQKERSV VVLSFGITVITLPPNEIIAIAEALEDK KMTFIWSL      298
2C1Z_A | PDBID | CHAIN | SEQUENCE DLKSKLRTYLNIGPFNLITPPVVPNT---TGCLQWLKERKPT SVVYISFGITVITPPPAEVVALSEALEASRVFFIWSL      307
3HBF_A | PDBID | CHAIN | SEQUENCE ELNSKFKLLLVGPFNLITPQRKVSD E---HGCLEWLDQ HENS SVVYISFGSVVTP PPHELTALAESLEECGFPFIWSF      309
.....250.....260.....270.....280.....290.....300.....310.....320

      * . .  * : * * * : * : * : * : * : * : * : * : * : * : * : * : * : * : * : * : * : * : * : * : * : * :
Solanum tuberosum RDNGVKILPKGFLE RTKEYGKIISWAPOLEILAHR SVGVFVTHCGWNSILEGISYGVPMICRPFPGDQKLN SRMVESVWE      378
2C1Z_A | PDBID | CHAIN | SEQUENCE RDKARVHLPPEGFL EKT RGYGMVVPWAPQAEVLAHEAVGAFVTHCGWNSLWESVAGGVPLICRPFPGDQRLN GRMVEDVLE      387
3HBF_A | PDBID | CHAIN | SEQUENCE RGDPEKLPKGFLE RTKTKGKIVAWAPQVEILKHS SVGVFLTHSGWNSVLE CIVGGVPMISRPFPGDQGLNTILT ESVLE      389
.....330.....340.....350.....360.....370.....380.....390.....400

      * : : * * : * * .  . . .  . : * * * * * : * : * : * : * : * : * : * : * : * : * : * : * : * : * : * :
Solanum tuberosum IGLQIEGGNFTKSGTISALSTFFNEEKGVLRKNVEGLKEKALEAVKLDNGSSIENFKVLVELVKCHKL      448
2C1Z_A | PDBID | CHAIN | SEQUENCE IGVRIEGGVFTKSGLMSCFDQILSQEKGKLRNLRALRETADRAVGP-KGSSTENFITLVDLVSKPKDV      456
3HBF_A | PDBID | CHAIN | SEQUENCE IGVGVNDGVLTKESIKKALEL TMSSEKGGIMRQKIVKLVKESAFKAVEQ-NGTSAMDFTLLIQIVIS---      454
.....410.....420.....430.....440.....450.....460.....470

```

```

* : : ***:.*.*.*.*.*.*.*.*.*.*.*.*.*.*.*.*.*.*.*.*.*.*.*.*.*.*.*.*.*.*.*.*.*.*.*.*.*.*
Vigna_mungo          MGNSEKKHVAVFSFPFGSHPTPLLNVLKLTNAAPNLQFSFIGTEHSNKSLLIKSPH-IPDTIKFYISISDGVPEGHVPG   79
3WC4_A | PDBID | CHAIN | SEQUENCE MKN---KQHVAIFPFPGSHLPLLNVLKLAHIAPNTSFSFIGTHSSN-AFLFKRH-IPNNIRVFTISDGIPEGHVPA   75
2C1Z_A | PDBID | CHAIN | SEQUENCE MSQTTNPHVAVLAFPFSTHAAPLLAVVRRLLLLAAAPHAVFSFFSTSQSNASIFHDSMHTMQCNKSYDIISDGVPEGYVFA   80
          1.....10.....20.....30.....40.....50.....60.....70.....80

```

```

.*.*.:** :*.*.:**.*.*.*.*.*.*.*.*.*.*.*.*.*.*.*.*.*.*.*.*.*.*.*.*.*.*.*.*.*.*.*.*.*.*.*.*.*
Vigna_mungo          GHPVERVNLFLQASPONLQKIDMAVAHTKERVTCVISDAFVAPSLTVAQRNLNVPPVVWPPLSCSLSAHFYTELIRQIC   159
3WC4_A | PDBID | CHAIN | SEQUENCE NNPIEKLDLFLSTGPDNLRKGIELAVAETKQSVTCCIADAFVTSLLVAQTLNVPWIAFWPNVSCSLSLYFNIDLIRDKC   155
2C1Z_A | PDBID | CHAIN | SEQUENCE GRPQEDIELFTRAAPSEFRQGMVMAVAETGRPVSCLVADAFIWFQAADMAEMGVAVLFPFWTAGPNSLSLTHVYIDEIREKI   160
          .....90.....100.....110.....120.....130.....140.....150.....160

```

```

.*.*.:** :*.*.:**.*.*.:**.*.*.*.*.*.*.*.*.*.*.*.*.*.*.*.*.*.*.*.*.*.*.*.*.*.*.*.*.*.*.*.*.*.*.*.*.*
Vigna_mungo          NSA---AGDTPLDVPGLSKMRVEDLPELVIOGAGEETLFSKTLASLGSVLPQAEAVVNNFFEELDPLLVDNPKSKF   235
3WC4_A | PDBID | CHAIN | SEQUENCE SKD---AKNATLDLFLPGLSKLRVEDVPODMLD-VGEKETLFSRTLSLGVVLPQAKAVVNNFFAELDPLFVKYMRSKL   230
2C1Z_A | PDBID | CHAIN | SEQUENCE GVSIGGREDELNLFIPGMSKVRFRDLOEGIVF--GNLNSLFSRMLHRMGQVLPKATAVFINSELELDDSLTNDLKSKL   237
          .....170.....180.....190.....200.....210.....220.....230.....240

```

```

* : * : * : * : * : * : * : * : * : * : * : * : * : * : * : * : * : * : * : * : * : * : * : * : * : * : * : * : * : * :
Vigna_mungo          KYLYLVGFLTSLPLPPLPSDIDETGCLSWLDKQKGGSVVYVSGFTVVTPPPHEIVAVAEALASGFPLWLSLKEHLKG   315
3WC4_A | PDBID | CHAIN | SEQUENCE QSLLYV---VPLPCQQLLLPEIDNGCLSWLDKSSRSVAVYVCFGTVVSPPPQEVVAVAEALASGFPPVWALKESLIS   306
2C1Z_A | PDBID | CHAIN | SEQUENCE KTYLNIIG--PENLITPPVVPE--NITGCLQWLKERKPTSVVYISFGVTTPPPAEVVALSEALASRVPFVWSLRDKARV   313
          .....250.....260.....270.....280.....290.....300.....310.....320

```

```

**:**:* * ** * **:*.*.*:**.***:**.**:**:*.*:**:*:**:*.***:*
Vigna_mungo          VLPNGFLERTSERGKVVGWAPQTQVLGHGSGVGVFVTHCGCNSVFESMSGVPMICRPFPGDHLTGRMVEDVWEIGVIVE   395
3WC4_A | PDBID | CHAIN | SEQUENCE ILLPKGFVERTSTRGKVVSQVSHVLSHGSGVGVFVTHCGANSVMESVNGVPMICRPFPGDGGIAARVQDIWEVGVIVE   386
2C1Z_A | PDBID | CHAIN | SEQUENCE HLEPEGFLKTRGYGMVVPWAPQAEVLAHEAVGAFVTHCGWNSLWESVAGGVPLICRPFPGDORLGRMVEDVLEIGVRIE   393
          .....330.....340.....350.....360.....370.....380.....390.....400

```

```

* **.*.*.*.:** * **.*.*.:**.*.**:**.**:**:**.*:**:*:**:*.***:*
Vigna_mungo          GGVFTKDGLLKSLRLILVEEGNLMKKNVAVKVKITVLDAAAGAQKAAQDFNTLVEIVSRF---   455
3WC4_A | PDBID | CHAIN | SEQUENCE GKVFTRKNGFVKSLLNLIIVQEDGKKIRDNALKVKQIVQDAVGPHGQAEDFNTLVEIVSS---   446
2C1Z_A | PDBID | CHAIN | SEQUENCE GGVFTKSGLMSCFDQILSDEKGGKLRNLRALRETADRAVGPKGSSLENFIILVDLVSKPKDV   456
          .....410.....420.....430.....440.....450.....460...

```
